# Supplementary material
Source: Research Square preprint supplement (doi:10.21203/rs.3.rs-9802259/v1)
Supplement: Supplementary file 1 [file 0ad64b978a8d9418ff520d64.pdf]

## Extended and Supplementary data:

### High-efficiency base editing enables multiplex inactivation of retroviral and immunologic barriers in porcine xenotransplantation

#### Authors

Ki-Eun Park<sup>1,2</sup>, Jerel Waters<sup>1,2</sup>, Sean G. Simpson<sup>1,2</sup>, Sai G.R. Yeddula<sup>1</sup>, Erin Scimeca<sup>2</sup>, Raju Murugesan<sup>1</sup>, Alexandria Borges<sup>3</sup>, Linda Sher<sup>3</sup>, Bhanu P.Telugu<sup>1,2,\*</sup>

#### Affiliations

<sup>1</sup> Division of Animal Science, University of Missouri, Columbia, MO, United States

<sup>2</sup> RenOvate Biosciences Inc, Reisterstown, MD 21136, United States

<sup>3</sup> Department of Surgery, Keck School of Medicine, University of Southern California, Los Angeles, CA 90033, United States

\*To whom correspondence needs to be addressed: [telugub@missouri.edu](mailto:telugub@missouri.edu)

#### This PDF file includes:

##### Extended Data Figures

**Figure 1.** Generation of PERV knockout pigs.

**Figure 2.** Generation and characterization of multiplex Xenoantigen and *GHR* null pigs.

**Figure 3.** Characterization of multiplex Xenoantigen and *GHR* null pigs.

##### Supplementary Data

1. PAC-Bio high-fidelity WGS reads for fetus #9 and -13 used for generating PERV-null piglets.

2. Pathology report of human blood perfusion of Xenoantigen null and WT livers

##### Supplementary Tables

**Table S1.** Single Guide (sg) RNA used in the manuscript.

**Table S2.** Primers used

**Table S3.** Reference Target amplicon sequence of target genes

**Table S4.** Antibodies and lectins used in the study for immunohistochemistry and FACS analysis

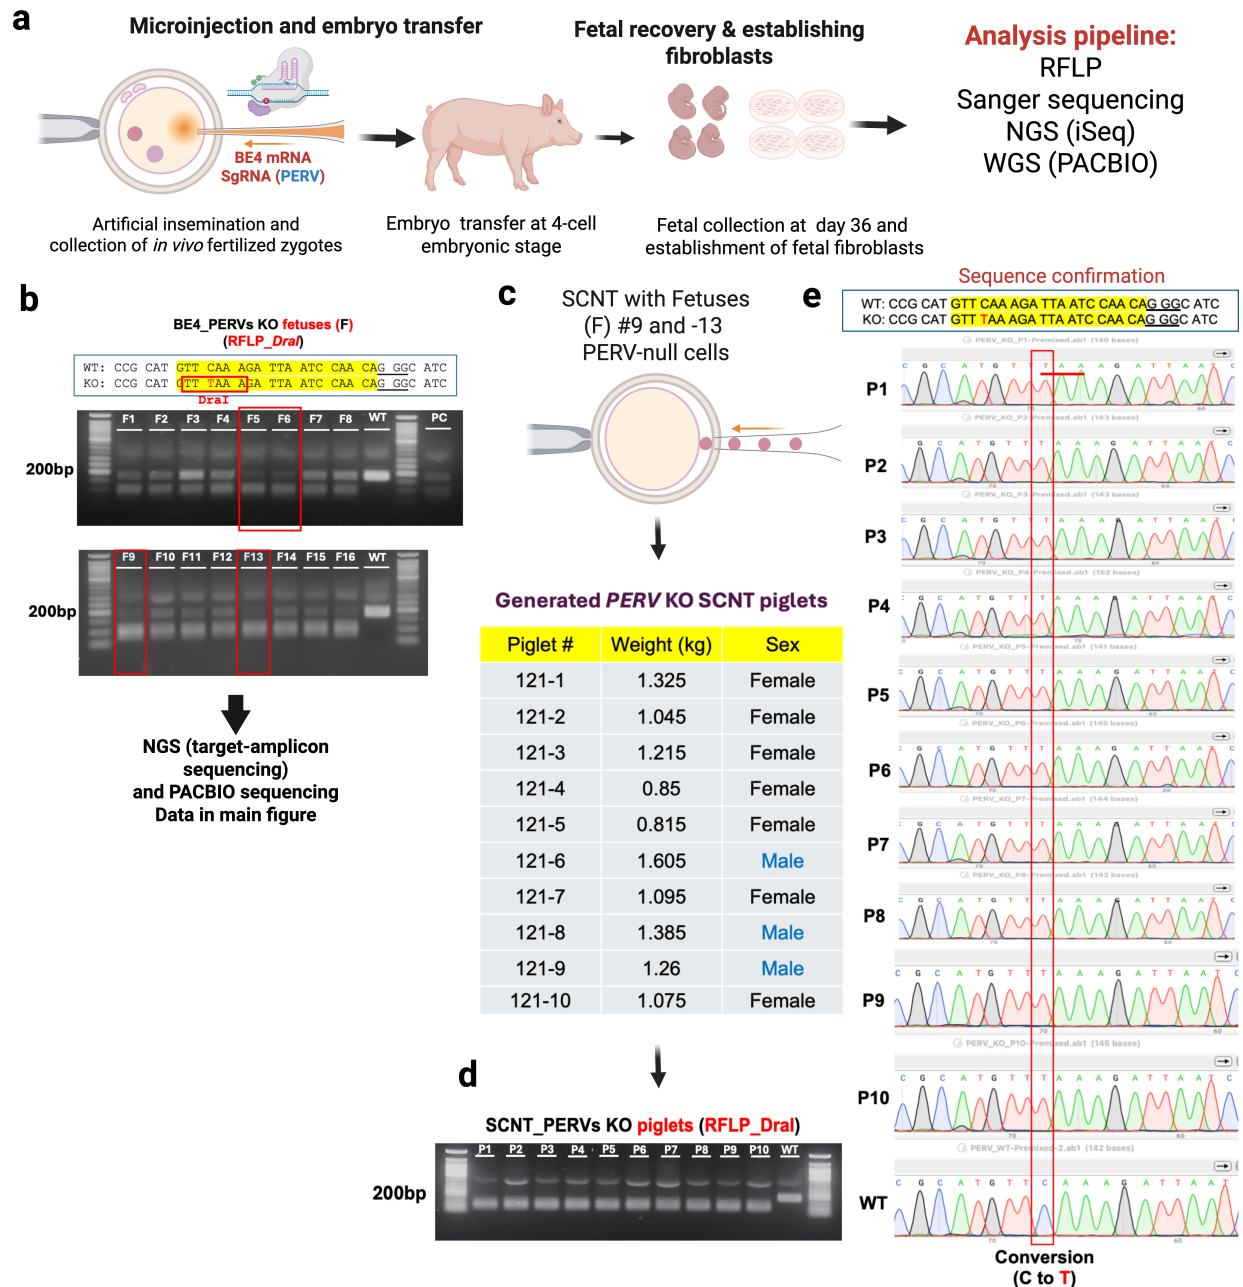

**Extended Data Fig.1. Generation of PERV knockout pigs. A)** Schematic overview of the strategy used to generate PERV knockout pigs. *In vivo*-derived embryos were microinjected with BE4 base-editing reagents targeting PERV loci and transferred into recipient females. Fetuses were recovered at embryonic day 36, and porcine fetal fibroblasts (PFFs) were established from individual fetuses. **B)** Restriction fragment length polymorphism (RFLP) analysis using *DraI*, generated by C-to-T conversion within the editing window, demonstrated high-efficiency editing in fetuses #9 and #13, which was subsequently validated by PacBio HiFi sequencing. **C)** PFFs derived from fetuses #9 and #13 were used as donor cells for somatic cell nuclear transfer (SCNT) to generate PERV-null pigs. **D–E)** RFLP and Sanger sequencing analyses confirmed complete C-to-T conversion of PERV loci in the resulting piglets.

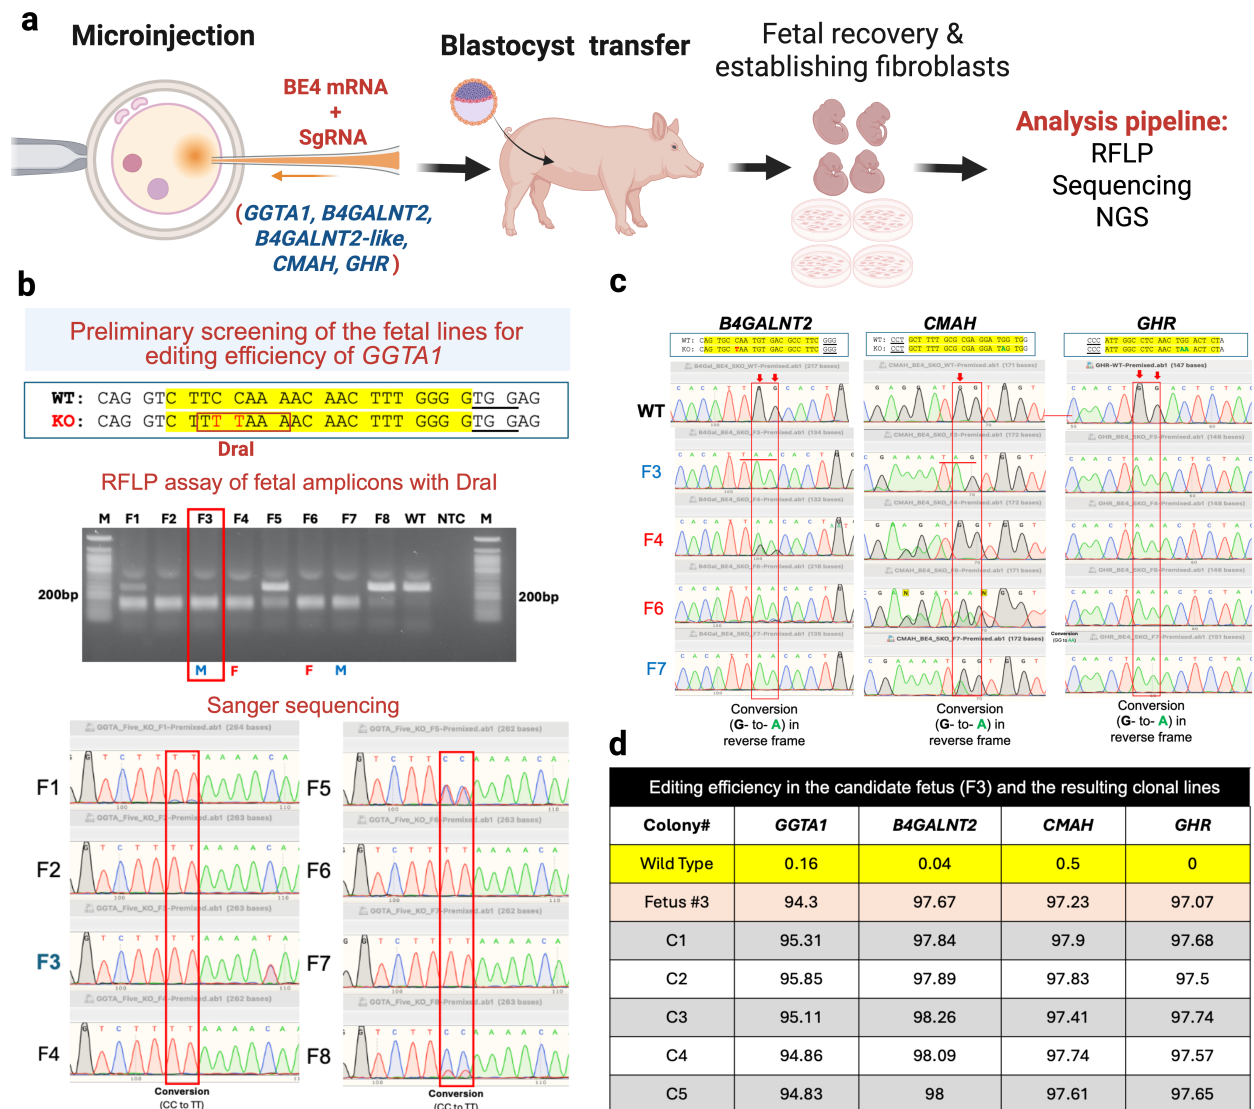

**Extended Data Fig. 2. Generation of multiplex xenoantigen- and GHR-null fetal lines for production of five-gene knockout pigs.**

**a)** Schematic overview of the strategy used to generate multiplex xenoantigen knockout pigs. *In vitro* fertilized (IVF) embryos were microinjected with BE4 base-editing reagents targeting *GGTA1*, *B4GALNT2*, *CMAH*, and *GHR*. Following embryo transfer, fetuses were recovered at embryonic day 75, and porcine fetal fibroblasts (PFFs) were established from individual fetuses; **b)** Restriction fragment length polymorphism (RFLP) analysis using *DraI*, generated by C-to-T conversion within the editing window, demonstrated efficient editing of *GGTA1* in fetuses #3, #4, and #6, which was further validated by Sanger sequencing; **c)** Sanger sequencing confirmed high-efficiency editing of *B4GALNT2*, *CMAH*, and *GHR* in fetus #3; **d)** PFFs derived from fetus #3 were clonally expanded, and targeted amplicon sequencing confirmed high-efficiency editing across all targeted loci in individual clonal cell lines.

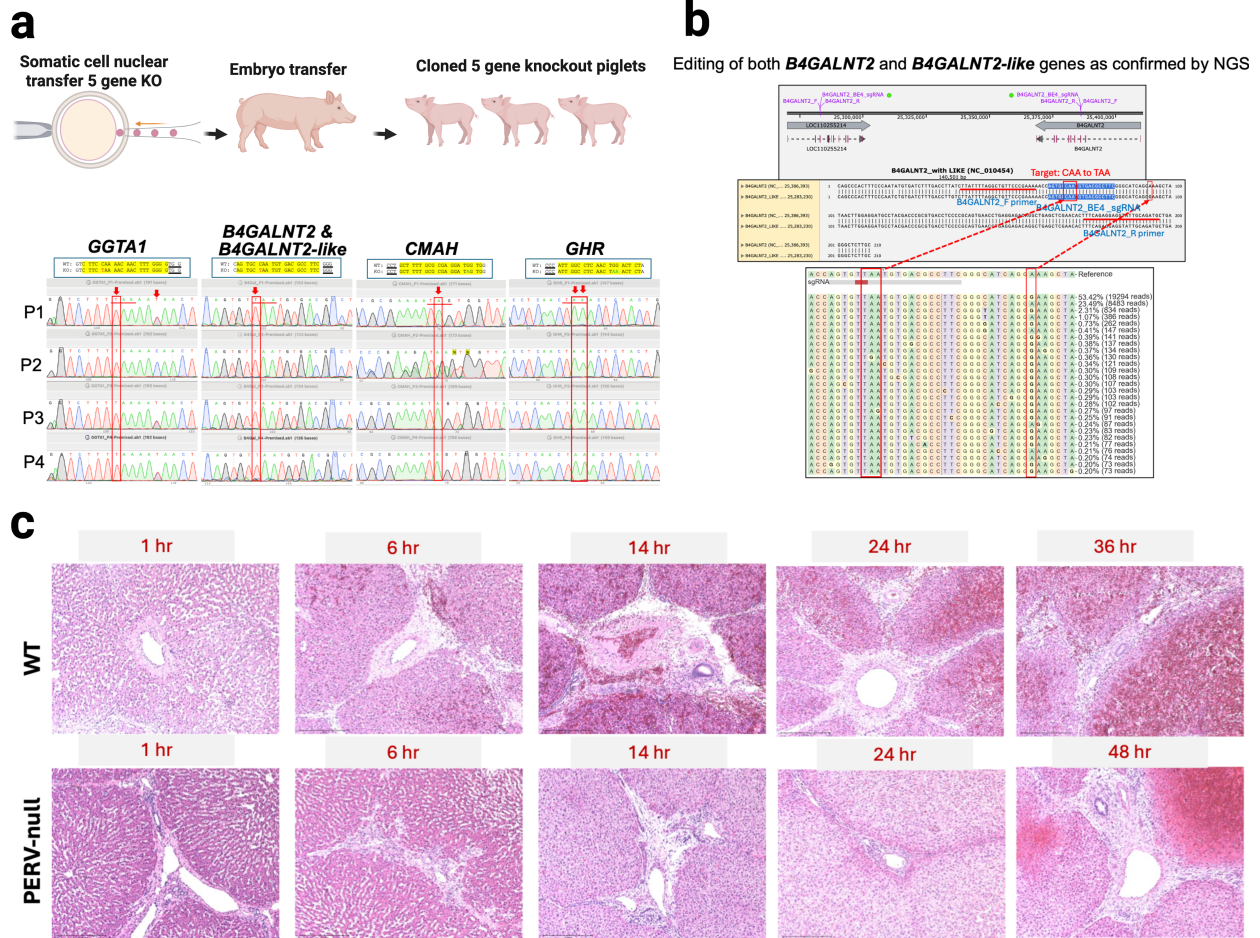

**Extended Data Fig. 3. Characterization of multiplex xenoantigen- and *GHR*-null fetal lines for production of five-gene knockout pigs.** **a)** PFFs derived from colony # 3 were used as donor cells for somatic cell nuclear transfer (SCNT) to generate xenoantigen- and *GHR*-null piglets ( $n = 4$ ). Sanger sequencing and targeted next-generation sequencing (NGS) confirmed that piglets #3 and #4 were homozygous null at all targeted loci; **b)** The sgRNA designed for *B4GALNT2* also targets the *B4GALNT2-like* locus. A single-nucleotide polymorphism (SNP) located downstream of the sgRNA target site (dotted box) distinguished *B4GALNT2* from *B4GALNT2-like* and confirmed efficient editing at both loci based on NGS read analysis; **c)** Representative histological images of liver biopsies from WT and 5 gene KO pigs on different days and at different times during perfusion. Scale bar: 275  $\mu$ m.

**Supplementary data 1. PAC-Bio high-fidelity WGS reads for fetus #9 and -13 used for generating PERV-null offspring.**

**BLASTN 2.9.0+** Blast was performed as outlined in Altschul et al., with a Matrix: blastn matrix 1 -3  
Gap Penalties: Existence: 5, Extension: 2

**Reference:** Stephen F. Altschul, Thomas L. Madden, Alejandro A. Schäffer, Jinghui Zhang, Zheng Zhang, Webb Miller, David J. Lipman, Gapped BLAST and PSI-BLAST: a new generation of protein database search programs, *Nucleic Acids Research*, Volume 25, Issue 17, 1 September 1997, Pages 3389-3402.

| Summary of PAC-BIO sequencing and Blast results |                |                       |                 |                  |
|-------------------------------------------------|----------------|-----------------------|-----------------|------------------|
| Fetus                                           | # of PERV hits | Database              | # of sequences  | Total base pairs |
| 9                                               | 36             | f9_final.p_ctg.fasta  | 3,943 sequences | 2,596,137,665    |
| 13                                              | 43             | f13_final.p_ctg.fasta | 3,025 sequences | 2,610,651,477    |

**Fetus #9**

Query= AY056035.1 Porcine endogenous retrovirus PCR amplicon

Length=26

| Sequences producing significant alignments: | Score<br>(Bits) | E<br>Value |
|---------------------------------------------|-----------------|------------|
| ctg/p/1/000425/0                            | 44.1            | 0.001      |
| ctg/p/1/000399/0                            | 44.1            | 0.001      |
| ctg/p/1/000389/0                            | 44.1            | 0.001      |
| ctg/p/1/000366/0                            | 44.1            | 0.001      |
| ctg/p/1/002928/0                            | 44.1            | 0.001      |
| ctg/p/1/002643/0                            | 44.1            | 0.001      |
| ctg/p/1/009548/0                            | 44.1            | 0.001      |
| ctg/p/1/005979/0                            | 44.1            | 0.001      |
| ctg/p/1/005710/0                            | 44.1            | 0.001      |
| ctg/p/1/000072/0                            | 44.1            | 0.001      |
| ctg/p/1/000051/0                            | 44.1            | 0.001      |
| ctg/p/1/000050/0                            | 44.1            | 0.001      |
| ctg/p/1/000226/0                            | 44.1            | 0.001      |
| ctg/p/1/000336/0                            | 44.1            | 0.001      |
| ctg/p/1/000321/0                            | 44.1            | 0.001      |
| ctg/p/1/000295/0                            | 44.1            | 0.001      |
| ctg/p/1/000269/0                            | 44.1            | 0.001      |
| ctg/p/1/000182/0                            | 44.1            | 0.001      |
| ctg/p/1/000177/0                            | 44.1            | 0.001      |
| ctg/p/1/000173/0                            | 44.1            | 0.001      |
| ctg/p/1/000138/0                            | 44.1            | 0.001      |
| ctg/p/1/000133/0                            | 44.1            | 0.001      |
| ctg/p/1/000013/0                            | 44.1            | 0.001      |
| ctg/p/1/000026/0                            | 44.1            | 0.001      |
| ctg/p/1/002318/0                            | 44.1            | 0.001      |
| ctg/p/1/001040/0                            | 44.1            | 0.001      |
| ctg/p/1/000970/0                            | 44.1            | 0.001      |
| ctg/p/1/000833/0                            | 44.1            | 0.001      |
| ctg/p/1/000001/0                            | 44.1            | 0.001      |
| ctg/p/1/000632/0                            | 44.1            | 0.001      |
| ctg/p/1/000605/0                            | 44.1            | 0.001      |
| ctg/p/1/000585/0                            | 44.1            | 0.001      |
| ctg/p/1/000077/0                            | 40.1            | 0.019      |
| ctg/p/1/000524/0                            | 40.1            | 0.019      |
| ctg/p/1/000054/0                            | 38.2            | 0.076      |
| ctg/p/1/000180/0                            | 36.2            | 0.30       |
| ctg/p/1/000175/0                            | 34.2            | 1.2        |

|                  |      |     |
|------------------|------|-----|
| ctg/p/1/000200/0 | 34.2 | 1.2 |
| ctg/p/1/001076/0 | 34.2 | 1.2 |
| ctg/p/1/000422/0 | 32.2 | 4.7 |
| ctg/p/1/000391/0 | 32.2 | 4.7 |
| ctg/p/1/000362/0 | 32.2 | 4.7 |
| ctg/p/1/000083/0 | 32.2 | 4.7 |
| ctg/p/1/000074/0 | 32.2 | 4.7 |
| ctg/p/1/000062/0 | 32.2 | 4.7 |
| ctg/p/1/000060/0 | 32.2 | 4.7 |
| ctg/p/1/000335/0 | 32.2 | 4.7 |
| ctg/p/1/000302/0 | 32.2 | 4.7 |
| ctg/p/1/000279/0 | 32.2 | 4.7 |
| ctg/p/1/000265/0 | 32.2 | 4.7 |
| ctg/p/1/000157/0 | 32.2 | 4.7 |
| ctg/p/1/000142/0 | 32.2 | 4.7 |
| ctg/p/1/000202/0 | 32.2 | 4.7 |
| ctg/p/1/000196/0 | 32.2 | 4.7 |
| ctg/p/1/000018/0 | 32.2 | 4.7 |
| ctg/p/1/001423/0 | 32.2 | 4.7 |
| ctg/p/1/000714/0 | 32.2 | 4.7 |
| ctg/p/1/000936/0 | 32.2 | 4.7 |
| ctg/p/1/000004/0 | 32.2 | 4.7 |
| ctg/p/1/000684/0 | 32.2 | 4.7 |
| ctg/p/1/000603/0 | 32.2 | 4.7 |
| ctg/p/1/000545/0 | 32.2 | 4.7 |

```
>ctg/p/1/000425/0
Length=1698214
Score = 44.1 bits (22), Expect = 0.001
Identities = 25/26 (96%), Gaps = 0/26 (0%)
Strand=Plus/Plus
Query 1      CATGTTCAAAGATTAATCCAACAGGG 26
          ||||| |||||
Sbjct 94999  CATGTTCAAAGATTAATCCAACAGGG 95024
```

```
>ctg/p/1/000399/0
Length=1811779
Score = 44.1 bits (22), Expect = 0.001
Identities = 25/26 (96%), Gaps = 0/26 (0%)
Strand=Plus/Plus
Query 1      CATGTTCAAAGATTAATCCAACAGGG 26
          ||||| |||||
Sbjct 854023  CATGTTCAAAGATTAATCCAACAGGG 854048
```

```
>ctg/p/1/000389/0
Length=1862131
Score = 44.1 bits (22), Expect = 0.001
Identities = 25/26 (96%), Gaps = 0/26 (0%)
Strand=Plus/Plus
Query 1      CATGTTCAAAGATTAATCCAACAGGG 26
          ||||| |||||
Sbjct 1744602  CATGTTCAAAGATTAATCCAACAGGG 1744627
```

```
>ctg/p/1/000366/0
Length=1979073
Score = 44.1 bits (22), Expect = 0.001
Identities = 25/26 (96%), Gaps = 0/26 (0%)
Strand=Plus/Minus
Query 1      CATGTTCAAAGATTAATCCAACAGGG 26
          ||||| |||||
Sbjct 460250  CATGTTCAAAGATTAATCCAACAGGG 460225
```

```

>ctg/p/1/002928/0
Length=190345
Score = 44.1 bits (22), Expect = 0.001
Identities = 25/26 (96%), Gaps = 0/26 (0%)
Strand=Plus/Plus
Query 1          CATGTTCAAAGATTAATCCAACAGGG 26
                ||||||| |||||||||||||||||||
Sbjct 134443    CATGTTTAAAGATTAATCCAACAGGG 134468

>ctg/p/1/002643/0
Length=209586
Score = 44.1 bits (22), Expect = 0.001
Identities = 25/26 (96%), Gaps = 0/26 (0%)
Strand=Plus/Minus
Query 1          CATGTTCAAAGATTAATCCAACAGGG 26
                ||||||| |||||||||||||||||||
Sbjct 140211    CATGTTTAAAGATTAATCCAACAGGG 140186

>ctg/p/1/009548/0
Length=32996
Score = 44.1 bits (22), Expect = 0.001
Identities = 25/26 (96%), Gaps = 0/26 (0%)
Strand=Plus/Plus
Query 1          CATGTTCAAAGATTAATCCAACAGGG 26
                ||||||| |||||||||||||||||||
Sbjct 15762     CATGTTTAAAGATTAATCCAACAGGG 15787

>ctg/p/1/005979/0
Length=75464
Score = 44.1 bits (22), Expect = 0.001
Identities = 25/26 (96%), Gaps = 0/26 (0%)
Strand=Plus/Plus
Query 1          CATGTTCAAAGATTAATCCAACAGGG 26
                ||||||| |||||||||||||||||||
Sbjct 2868      CATGTTTAAAGATTAATCCAACAGGG 2893

>ctg/p/1/005710/0
Length=81216
Score = 44.1 bits (22), Expect = 0.001
Identities = 25/26 (96%), Gaps = 0/26 (0%)
Strand=Plus/Minus
Query 1          CATGTTCAAAGATTAATCCAACAGGG 26
                ||||||| |||||||||||||||||||
Sbjct 28164     CATGTTTAAAGATTAATCCAACAGGG 28139

>ctg/p/1/000072/0
Length=5526174
Score = 44.1 bits (22), Expect = 0.001
Identities = 25/26 (96%), Gaps = 0/26 (0%)
Strand=Plus/Plus
Query 1          CATGTTCAAAGATTAATCCAACAGGG 26
                ||||||| |||||||||||||||||||
Sbjct 1639604   CATGTTTAAAGATTAATCCAACAGGG 1639629

>ctg/p/1/000051/0
Length=6330453
Score = 44.1 bits (22), Expect = 0.001
Identities = 25/26 (96%), Gaps = 0/26 (0%)
Strand=Plus/Minus
Query 1          CATGTTCAAAGATTAATCCAACAGGG 26
                ||||||| |||||||||||||||||||
Sbjct 6187268   CATGTTCAAAGATTAATCCAACAGGG 6187243

```

```
>ctg/p/1/000050/0
Length=6427933
Score = 44.1 bits (22), Expect = 0.001
Identities = 25/26 (96%), Gaps = 0/26 (0%)
Strand=Plus/Minus
Query 1          CATGTTCAAAGATTAATCCAACAGGG 26
                |||||  |||||  |||||  |||||  |||||
Sbjct 2743893    CATGTTCAAAGATTAATCCAACAGGG 2743868
```

```
>ctg/p/1/000226/0
Length=2848685
Score = 44.1 bits (22), Expect = 0.001
Identities = 25/26 (96%), Gaps = 0/26 (0%)
Strand=Plus/Plus
Query 1          CATGTTCAAAGATTAATCCAACAGGG 26
                |||||  |||||  |||||  |||||  |||||
Sbjct 780650     CATGTTCAAAGATTAATCCAACAGGG 780675
```

```
>ctg/p/1/000336/0
Length=2081358
Score = 44.1 bits (22), Expect = 0.001
Identities = 25/26 (96%), Gaps = 0/26 (0%)
Strand=Plus/Plus
Query 1          CATGTTCAAAGATTAATCCAACAGGG 26
                |||||  |||||  |||||  |||||  |||||
Sbjct 2048057    CATGTTCAAAGATTAATCCAACAGGG 2048082
```

```
>ctg/p/1/000321/0
Length=2148105
Score = 44.1 bits (22), Expect = 0.001
Identities = 25/26 (96%), Gaps = 0/26 (0%)
Strand=Plus/Plus
Query 1          CATGTTCAAAGATTAATCCAACAGGG 26
                |||||  |||||  |||||  |||||  |||||
Sbjct 2067770    CATGTTCAAAGATTAATCCAACAGGG 2067795
```

```
>ctg/p/1/000295/0
Length=2347788
Score = 44.1 bits (22), Expect = 0.001
Identities = 25/26 (96%), Gaps = 0/26 (0%)
Strand=Plus/Plus
Query 1          CATGTTCAAAGATTAATCCAACAGGG 26
                |||||  |||||  |||||  |||||  |||||
Sbjct 1138952    CATGTTCAAAGATTAATCCAACAGGG 1138977
```

```
>ctg/p/1/000269/0
Length=2487617
Score = 44.1 bits (22), Expect = 0.001
Identities = 25/26 (96%), Gaps = 0/26 (0%)
Strand=Plus/Plus
Query 1          CATGTTCAAAGATTAATCCAACAGGG 26
                |||||  |||||  |||||  |||||  |||||
Sbjct 921199     CATGTTCAAAGATTAATCCAACAGGG 921224
```

```
>ctg/p/1/000182/0
Length=3260350
Score = 44.1 bits (22), Expect = 0.001
Identities = 25/26 (96%), Gaps = 0/26 (0%)
Strand=Plus/Minus
Query 1          CATGTTCAAAGATTAATCCAACAGGG 26
                |||||  |||||  |||||  |||||  |||||
Sbjct 1123999    CATGTTCAAAGATTAATCCAACAGGG 1123974
```

```

>ctg/p/1/000177/0
Length=3326977
Score = 44.1 bits (22), Expect = 0.001
Identities = 25/26 (96%), Gaps = 0/26 (0%)
Strand=Plus/Plus
Query 1          CATGTTCAAAGATTAATCCAACAGGG 26
                ||||||| |||||||||||||||||||
Sbjct 625287     CATGTTTAAAGATTAATCCAACAGGG 625312

>ctg/p/1/000173/0
Length=3347718
Score = 44.1 bits (22), Expect = 0.001
Identities = 25/26 (96%), Gaps = 0/26 (0%)
Strand=Plus/Minus
Query 1          CATGTTCAAAGATTAATCCAACAGGG 26
                ||||||| |||||||||||||||||||
Sbjct 2966336   CATGTTTAAAGATTAATCCAACAGGG 2966311

>ctg/p/1/000138/0
Length=3830230
Score = 44.1 bits (22), Expect = 0.001
Identities = 25/26 (96%), Gaps = 0/26 (0%)
Strand=Plus/Plus
Query 1          CATGTTCAAAGATTAATCCAACAGGG 26
                ||||||| |||||||||||||||||||
Sbjct 2090243   CATGTTTAAAGATTAATCCAACAGGG 2090268

>ctg/p/1/000133/0
Length=3892079
Score = 44.1 bits (22), Expect = 0.001
Identities = 25/26 (96%), Gaps = 0/26 (0%)
Strand=Plus/Minus
Query 1          CATGTTCAAAGATTAATCCAACAGGG 26
                ||||||| |||||||||||||||||||
Sbjct 1756113   CATGTTTAAAGATTAATCCAACAGGG 1756088

>ctg/p/1/000013/0
Length=10423867
Score = 44.1 bits (22), Expect = 0.001
Identities = 25/26 (96%), Gaps = 0/26 (0%)
Strand=Plus/Plus
Query 1          CATGTTCAAAGATTAATCCAACAGGG 26
                ||||||| |||||||||||||||||||
Sbjct 9141588   CATGTTTAAAGATTAATCCAACAGGG 9141613

>ctg/p/1/000026/0
Length=8248876
Score = 44.1 bits (22), Expect = 0.001
Identities = 25/26 (96%), Gaps = 0/26 (0%)
Strand=Plus/Minus
Query 1          CATGTTCAAAGATTAATCCAACAGGG 26
                ||||||| |||||||||||||||||||
Sbjct 220872    CATGTTTAAAGATTAATCCAACAGGG 220847

Score = 44.1 bits (22), Expect = 0.001
Identities = 25/26 (96%), Gaps = 0/26 (0%)
Strand=Plus/Plus
Query 1          CATGTTCAAAGATTAATCCAACAGGG 26
                ||||||| |||||||||||||||||||
Sbjct 2569991   CATGTTTAAAGATTAATCCAACAGGG 2570016

```

```

>ctg/p/1/002318/0
Length=240946
Score = 44.1 bits (22), Expect = 0.001
Identities = 25/26 (96%), Gaps = 0/26 (0%)
Strand=Plus/Plus
Query 1      CATGTTCAAAGATTAATCCAACAGGG 26
          ||||||| ||||||| ||||||| |||||||
Sbjct 45290  CATGTTTAAAGATTAATCCAACAGGG 45315

>ctg/p/1/001040/0
Length=614708
Score = 44.1 bits (22), Expect = 0.001
Identities = 25/26 (96%), Gaps = 0/26 (0%)
Strand=Plus/Plus
Query 1      CATGTTCAAAGATTAATCCAACAGGG 26
          ||||||| ||||||| ||||||| |||||||
Sbjct 107250 CATGTTTAAAGATTAATCCAACAGGG 107275

>ctg/p/1/000970/0
Length=676519
Score = 44.1 bits (22), Expect = 0.001
Identities = 25/26 (96%), Gaps = 0/26 (0%)
Strand=Plus/Plus
Query 1      CATGTTCAAAGATTAATCCAACAGGG 26
          ||||||| ||||||| ||||||| |||||||
Sbjct 108092 CATGTTTAAAGATTAATCCAACAGGG 108117

>ctg/p/1/000833/0
Length=843063
Score = 44.1 bits (22), Expect = 0.001
Identities = 25/26 (96%), Gaps = 0/26 (0%)
Strand=Plus/Plus
Query 1      CATGTTCAAAGATTAATCCAACAGGG 26
          ||||||| ||||||| ||||||| |||||||
Sbjct 834192 CATGTTTAAAGATTAATCCAACAGGG 834217

>ctg/p/1/000001/0
Length=15542752
Score = 44.1 bits (22), Expect = 0.001
Identities = 25/26 (96%), Gaps = 0/26 (0%)
Strand=Plus/Minus
Query 1      CATGTTCAAAGATTAATCCAACAGGG 26
          ||||||| ||||||| ||||||| |||||||
Sbjct 1850446 CATGTTTAAAGATTAATCCAACAGGG 1850421

Score = 44.1 bits (22), Expect = 0.001
Identities = 25/26 (96%), Gaps = 0/26 (0%)
Strand=Plus/Minus
Query 1      CATGTTCAAAGATTAATCCAACAGGG 26
          ||||||| ||||||| ||||||| |||||||
Sbjct 6575248 CATGTTTAAAGATTAATCCAACAGGG 6575223

>ctg/p/1/000632/0
Length=1118915
Score = 44.1 bits (22), Expect = 0.001
Identities = 25/26 (96%), Gaps = 0/26 (0%)
Strand=Plus/Plus
Query 1      CATGTTCAAAGATTAATCCAACAGGG 26
          ||||||| ||||||| ||||||| |||||||
Sbjct 55542  CATGTTTAAAGATTAATCCAACAGGG 55567

```

```
>ctg/p/1/000605/0
Length=1178855
Score = 44.1 bits (22), Expect = 0.001
Identities = 25/26 (96%), Gaps = 0/26 (0%)
Strand=Plus/Plus
Query 1      CATGTTCAAAGATTAATCCAACAGGG 26
          ||||||| ||||||||||||||||
Sbjct 606860 CATGTTCAAAGATTAATCCAACAGGG 606885
```

```
>ctg/p/1/000585/0
Length=1207161
Score = 44.1 bits (22), Expect = 0.001
Identities = 25/26 (96%), Gaps = 0/26 (0%)
Strand=Plus/Plus
Query 1      CATGTTCAAAGATTAATCCAACAGGG 26
          ||||||| ||||||||||||||||
Sbjct 492567 CATGTTCAAAGATTAATCCAACAGGG 492592
```

```
>ctg/p/1/000077/0
Length=5416062
Score = 40.1 bits (20), Expect = 0.019
Identities = 20/20 (100%), Gaps = 0/20 (0%)
Strand=Plus/Plus
Query 1      CATGTTCAAAGATTAATCCA 20
          ||||||| ||||||||||||
Sbjct 2600600 CATGTTCAAAGATTAATCCA 2600619
```

Potential off-target #1:  
No PAM motif. No C-to-T conversion

```
>ctg/p/1/000524/0
Length=1363716
Score = 40.1 bits (20), Expect = 0.019
Identities = 23/24 (96%), Gaps = 0/24 (0%)
Strand=Plus/Minus
Query 3      TGTTCAAAGATTAATCCAACAGGG 26
          ||||| ||||||||||||||||
Sbjct 728319 TGTTCAAAGATTAATCCAACAGGG 728296
```

```
>ctg/p/1/000054/0
Length=6188867
Score = 38.2 bits (19), Expect = 0.076
Identities = 19/19 (100%), Gaps = 0/19 (0%)
Strand=Plus/Minus
Query 8      AAAGATTAATCCAACAGGG 26
          ||||||| ||||||||
Sbjct 4840885 AAAGATTAATCCAACAGGG 4840867
```

Potential off-target #2:  
No full-length guide match.  
No "C" in the editing window.  
No modification.

```
>ctg/p/1/000180/0
Length=3309818
Score = 36.2 bits (18), Expect = 0.30
Identities = 24/26 (92%), Gaps = 0/26 (0%)
Strand=Plus/Minus
Query 1      CATGTTCAAAGATTAATCCAACAGGG 26
          ||||||| ||| ||||||||||||||||
Sbjct 2241381 CATGTTCAAAGATTAATCCAACAGGG 2241356
```

```
>ctg/p/1/000175/0
Length=3335648
Score = 34.2 bits (17), Expect = 1.2
Identities = 17/17 (100%), Gaps = 0/17 (0%)
Strand=Plus/Minus
Query 8      AAAGATTAATCCAACAG 24
          ||||||| ||||||||
Sbjct 3288290 AAAGATTAATCCAACAG 3288274
```

Other potential off-targets:  
No full-length guide match.  
No "C" in the editing window.  
No modification.

```
>ctg/p/1/000200/0
Length=3037360
Score = 34.2 bits (17), Expect = 1.2
Identities = 17/17 (100%), Gaps = 0/17 (0%)
Strand=Plus/Plus
Query 6      TCAAAGATTAATCCAAC 22
            |||
Sbjct 1634838 TCAAAGATTAATCCAAC 1634854
```

```
>ctg/p/1/001076/0
Length=594514
Score = 34.2 bits (17), Expect = 1.2
Identities = 17/17 (100%), Gaps = 0/17 (0%)
Strand=Plus/Plus
Query 8      AAAGATTAATCCAACAG 24
            |||
Sbjct 571034  AAAGATTAATCCAACAG 571050
```

```
>ctg/p/1/000422/0
Length=1311407
Score = 32.2 bits (16), Expect = 4.7
Identities = 16/16 (100%), Gaps = 0/16 (0%)
Strand=Plus/Minus
Query 5      TTCAAAGATTAATCCA 20
            |||
Sbjct 865275  TTCAAAGATTAATCCA 865260
```

```
>ctg/p/1/000391/0
Length=1850532
Score = 32.2 bits (16), Expect = 4.7
Identities = 16/16 (100%), Gaps = 0/16 (0%)
Strand=Plus/Plus
Query 1      CATGTTCAAAGATTAA 16
            |||
Sbjct 1830679  CATGTTCAAAGATTAA 1830694
```

```
>ctg/p/1/000362/0
Length=1991486
Score = 32.2 bits (16), Expect = 4.7
Identities = 16/16 (100%), Gaps = 0/16 (0%)
Strand=Plus/Plus
Query 1      CATGTTCAAAGATTAA 16
            |||
Sbjct 1806648  CATGTTCAAAGATTAA 1806663
```

```
>ctg/p/1/000083/0
Length=5135226
Score = 32.2 bits (16), Expect = 4.7
Identities = 16/16 (100%), Gaps = 0/16 (0%)
Strand=Plus/Plus
Query 1      CATGTTCAAAGATTAA 16
            |||
Sbjct 635934   CATGTTCAAAGATTAA 635949
```

```
>ctg/p/1/000074/0
Length=5458418
Score = 32.2 bits (16), Expect = 4.7
Identities = 16/16 (100%), Gaps = 0/16 (0%)
Strand=Plus/Plus
Query 5      TTCAAAGATTAATCCA 20
            |||
Sbjct 4188262  TTCAAAGATTAATCCA 4188277
```

Other potential off-targets: No full-length guide match. No modification.

```
>ctg/p/1/000062/0
Length=5849719
Score = 32.2 bits (16), Expect = 4.7
Identities = 16/16 (100%), Gaps = 0/16 (0%)
Strand=Plus/Minus
Query 2      ATGTTCAAAGATTAAT 17
            |||
Sbjct 1235238 ATGTTCAAAGATTAAT 1235223
```

```
>ctg/p/1/000060/0
Length=5947253
Score = 32.2 bits (16), Expect = 4.7
Identities = 16/16 (100%), Gaps = 0/16 (0%)
Strand=Plus/Plus
Query 2      ATGTTCAAAGATTAAT 17
            |||
Sbjct 427083  ATGTTCAAAGATTAAT 427098
```

```
>ctg/p/1/000335/0
Length=2086631
Score = 32.2 bits (16), Expect = 4.7
Identities = 16/16 (100%), Gaps = 0/16 (0%)
Strand=Plus/Minus
Query 1      CATGTTCAAAGATTAA 16
            |||
Sbjct 1157591 CATGTTCAAAGATTAA 1157576
```

```
>ctg/p/1/000302/0
Length=2312585
Score = 32.2 bits (16), Expect = 4.7
Identities = 19/20 (95%), Gaps = 0/20 (0%)
Strand=Plus/Minus
Query 1      CATGTTCAAAGATTAATCCA 20
            |||
Sbjct 146399  CATGTTCAAAGATTATCCA 146380
```

```
>ctg/p/1/000279/0
Length=2445595
Score = 32.2 bits (16), Expect = 4.7
Identities = 16/16 (100%), Gaps = 0/16 (0%)
Strand=Plus/Minus
Query 1      CATGTTCAAAGATTAA 16
            |||
Sbjct 1044370 CATGTTCAAAGATTAA 1044355
```

```
>ctg/p/1/000265/0
Length=2514779
Score = 32.2 bits (16), Expect = 4.7
Identities = 16/16 (100%), Gaps = 0/16 (0%)
Strand=Plus/Minus
Query 2      ATGTTCAAAGATTAAT 17
            |||
Sbjct 2044770 ATGTTCAAAGATTAAT 2044755
```

```
>ctg/p/1/000157/0
Length=3535457
Score = 32.2 bits (16), Expect = 4.7
Identities = 16/16 (100%), Gaps = 0/16 (0%)
Strand=Plus/Plus
Query 6      TCAAAGATTAATCCAA 21
            |||
Sbjct 1466445 TCAAAGATTAATCCAA 1466460
```

Other potential off-targets: No full-length guide match. No modification.

Not a perfect match. No PAM motif. The A-to-T variant is likely a SNP.

Other potential off-targets: No full-length guide match. No modification.

```
>ctg/p/1/000142/0
Length=3770831
Score = 32.2 bits (16), Expect = 4.7
Identities = 16/16 (100%), Gaps = 0/16 (0%)
Strand=Plus/Minus
Query 6      TCAAAGATTAATCCAA  21
            |||
Sbjct 3564532 TCAAAGATTAATCCAA 3564517
```

```
>ctg/p/1/000202/0
Length=3013145
Score = 32.2 bits (16), Expect = 4.7
Identities = 16/16 (100%), Gaps = 0/16 (0%)
Strand=Plus/Minus
Query 7      CAAAGATTAATCCAAC  22
            |||
Sbjct 1622308 CAAAGATTAATCCAAC 1622293
```

```
>ctg/p/1/000196/0
Length=3124558
Score = 32.2 bits (16), Expect = 4.7
Identities = 16/16 (100%), Gaps = 0/16 (0%)
Strand=Plus/Plus
Query 2      ATGTTCAAAGATTAAT  17
            |||
Sbjct 1256755 ATGTTCAAAGATTAAT 1256770
```

```
>ctg/p/1/000018/0
Length=9509432
Score = 32.2 bits (16), Expect = 4.7
Identities = 16/16 (100%), Gaps = 0/16 (0%)
Strand=Plus/Minus
Query 2      ATGTTCAAAGATTAAT  17
            |||
Sbjct 7522265 ATGTTCAAAGATTAAT 7522250
```

```
>ctg/p/1/001423/0
Length=345759
Score = 32.2 bits (16), Expect = 4.7
Identities = 16/16 (100%), Gaps = 0/16 (0%)
Strand=Plus/Minus
Query 1      CATGTTCAAAGATTAA  16
            |||
Sbjct 219172  CATGTTCAAAGATTAA 219157
```

```
>ctg/p/1/000714/0
Length=466072
Score = 32.2 bits (16), Expect = 4.7
Identities = 16/16 (100%), Gaps = 0/16 (0%)
Strand=Plus/Minus
Query 6      TCAAAGATTAATCCAA  21
            |||
Sbjct 437812  TCAAAGATTAATCCAA 437797
```

```
>ctg/p/1/000936/0
Length=712211
Score = 32.2 bits (16), Expect = 4.7
Identities = 16/16 (100%), Gaps = 0/16 (0%)
Strand=Plus/Minus
Query 6      TCAAAGATTAATCCAA  21
            |||
Sbjct 565900  TCAAAGATTAATCCAA 565885
```

Other potential off-targets: No full-length guide match. No modification.

```
>ctg/p/1/000004/0
Length=14599509
Score = 32.2 bits (16), Expect = 4.7
Identities = 16/16 (100%), Gaps = 0/16 (0%)
Strand=Plus/Minus
Query 2      ATGTTCAAAGATTAAT 17
            |||
Sbjct 14458520 ATGTTCAAAGATTAAT 14458505
```

```
>ctg/p/1/000684/0
Length=1025105
Score = 32.2 bits (16), Expect = 4.7
Identities = 16/16 (100%), Gaps = 0/16 (0%)
Strand=Plus/Minus
Query 1      CATGTTCAAAGATTAA 16
            |||
Sbjct 763577  CATGTTCAAAGATTAA 763562
```

```
>ctg/p/1/000603/0
Length=1181885
Score = 32.2 bits (16), Expect = 4.7
Identities = 16/16 (100%), Gaps = 0/16 (0%)
Strand=Plus/Plus
Query 3      TGTTC AAAGATTAATC 18
            |||
Sbjct 678227  TGTTC AAAGATTAATC 678242
```

```
>ctg/p/1/000545/0
Length=1313736
Score = 32.2 bits (16), Expect = 4.7
Identities = 16/16 (100%), Gaps = 0/16 (0%)
Strand=Plus/Minus
Query 8      AAAGATTAATCCAACA 23
            |||
Sbjct 1021717  AAAGATTAATCCAACA 1021702
```

Other potential off-targets: No full-length guide match. No modification.

**F13 fetus**

| <b>Sequences producing significant alignments:</b> | <b>Score<br/>(Bits)</b> | <b>E<br/>Value</b> |
|----------------------------------------------------|-------------------------|--------------------|
| ctg/p/1/000279/0                                   | 44.1                    | 0.001              |
| ctg/p/1/000255/0                                   | 44.1                    | 0.001              |
| ctg/p/1/000233/0                                   | 44.1                    | 0.001              |
| ctg/p/1/000231/0                                   | 44.1                    | 0.001              |
| ctg/p/1/002483/0                                   | 44.1                    | 0.001              |
| ctg/p/1/000184/0                                   | 44.1                    | 0.001              |
| ctg/p/1/000182/0                                   | 44.1                    | 0.001              |
| ctg/p/1/000155/0                                   | 44.1                    | 0.001              |
| ctg/p/1/004762/0                                   | 44.1                    | 0.001              |
| ctg/p/1/004391/0                                   | 44.1                    | 0.001              |
| ctg/p/1/003920/0                                   | 44.1                    | 0.001              |
| ctg/p/1/000023/0                                   | 44.1                    | 0.001              |
| ctg/p/1/000020/0                                   | 44.1                    | 0.001              |
| ctg/p/1/000018/0                                   | 44.1                    | 0.001              |
| ctg/p/1/000044/0                                   | 44.1                    | 0.001              |
| ctg/p/1/000041/0                                   | 44.1                    | 0.001              |
| ctg/p/1/000064/0                                   | 44.1                    | 0.001              |
| ctg/p/1/000051/0                                   | 44.1                    | 0.001              |
| ctg/p/1/000071/0                                   | 44.1                    | 0.001              |
| ctg/p/1/000083/0                                   | 44.1                    | 0.001              |
| ctg/p/1/000120/0                                   | 44.1                    | 0.001              |
| ctg/p/1/000133/0                                   | 44.1                    | 0.001              |
| ctg/p/1/000011/0                                   | 44.1                    | 0.001              |
| ctg/p/1/000807/0                                   | 44.1                    | 0.001              |
| ctg/p/1/000730/0                                   | 44.1                    | 0.001              |
| ctg/p/1/001207/0                                   | 44.1                    | 0.001              |
| ctg/p/1/001050/0                                   | 44.1                    | 0.001              |
| ctg/p/1/000002/0                                   | 44.1                    | 0.001              |
| ctg/p/1/000001/0                                   | 44.1                    | 0.001              |
| ctg/p/c/006551/0                                   | 44.1                    | 0.001              |
| ctg/p/1/000005/0                                   | 44.1                    | 0.001              |
| ctg/p/1/000004/0                                   | 44.1                    | 0.001              |
| ctg/p/1/000404/0                                   | 44.1                    | 0.001              |
| ctg/p/1/000391/0                                   | 44.1                    | 0.001              |
| ctg/p/1/000366/0                                   | 44.1                    | 0.001              |
| ctg/p/1/000363/0                                   | 44.1                    | 0.001              |
| ctg/p/1/000347/0                                   | 44.1                    | 0.001              |
| ctg/p/1/000329/0                                   | 44.1                    | 0.001              |
| ctg/p/1/000584/0                                   | 44.1                    | 0.001              |
| ctg/p/1/000532/0                                   | 44.1                    | 0.001              |
| ctg/p/1/000019/0                                   | 40.1                    | 0.019              |
| ctg/p/1/000006/0                                   | 40.1                    | 0.019              |
| ctg/p/1/000077/0                                   | 36.2                    | 0.30               |
| ctg/p/1/000042/0                                   | 34.2                    | 1.2                |
| ctg/p/1/000065/0                                   | 34.2                    | 1.2                |
| ctg/p/1/000283/0                                   | 32.2                    | 4.7                |
| ctg/p/1/000229/0                                   | 32.2                    | 4.7                |
| ctg/p/1/000157/0                                   | 32.2                    | 4.7                |
| ctg/p/1/000022/0                                   | 32.2                    | 4.7                |
| ctg/p/1/000035/0                                   | 32.2                    | 4.7                |
| ctg/p/1/000034/0                                   | 32.2                    | 4.7                |
| ctg/p/1/000031/0                                   | 32.2                    | 4.7                |
| ctg/p/1/000030/0                                   | 32.2                    | 4.7                |
| ctg/p/1/000029/0                                   | 32.2                    | 4.7                |
| ctg/p/1/000048/0                                   | 32.2                    | 4.7                |
| ctg/p/1/000045/0                                   | 32.2                    | 4.7                |
| ctg/p/1/000061/0                                   | 32.2                    | 4.7                |
| ctg/p/1/000078/0                                   | 32.2                    | 4.7                |
| ctg/p/1/000076/0                                   | 32.2                    | 4.7                |

|                  |      |     |
|------------------|------|-----|
| ctg/p/1/000070/0 | 32.2 | 4.7 |
| ctg/p/1/000110/0 | 32.2 | 4.7 |
| ctg/p/1/000142/0 | 32.2 | 4.7 |
| ctg/p/1/000132/0 | 32.2 | 4.7 |
| ctg/p/1/000015/0 | 32.2 | 4.7 |
| ctg/p/1/000813/0 | 32.2 | 4.7 |
| ctg/p/1/000790/0 | 32.2 | 4.7 |
| ctg/p/1/000848/0 | 32.2 | 4.7 |
| ctg/p/1/001105/0 | 32.2 | 4.7 |
| ctg/p/1/000309/0 | 32.2 | 4.7 |

```
>ctg/p/1/000279/0
Length=2076092
Score = 44.1 bits (22), Expect = 0.001
Identities = 25/26 (96%), Gaps = 0/26 (0%)
Strand=Plus/Minus
Query 1      CATGTTCAAAGATTAATCCAACAGGG 26
          ||||| |||||
Sbjct 831728 CATGTTTAAAGATTAATCCAACAGGG 831703
```

```
>ctg/p/1/000255/0
Length=2270825
Score = 44.1 bits (22), Expect = 0.001
Identities = 25/26 (96%), Gaps = 0/26 (0%)
Strand=Plus/Minus
Query 1      CATGTTCAAAGATTAATCCAACAGGG 26
          ||||| |||||
Sbjct 804448 CATGTTTAAAGATTAATCCAACAGGG 804423
```

```
>ctg/p/1/000233/0
Length=2548522
Score = 44.1 bits (22), Expect = 0.001
Identities = 25/26 (96%), Gaps = 0/26 (0%)
Strand=Plus/Plu
Query 1      CATGTTCAAAGATTAATCCAACAGGG 26
          ||||| |||||
Sbjct 1579861 CATGTTTAAAGATTAATCCAACAGGG 1579886
```

```
>ctg/p/1/000231/0
Length=2570186
Score = 44.1 bits (22), Expect = 0.001
Identities = 25/26 (96%), Gaps = 0/26 (0%)
Strand=Plus/Minus
Query 1      CATGTTCAAAGATTAATCCAACAGGG 26
          ||||| |||||
Sbjct 1957360 CATGTTTAAAGATTAATCCAACAGGG 1957335
```

```
>ctg/p/1/002483/0
Length=188985
Score = 44.1 bits (22), Expect = 0.001
Identities = 25/26 (96%), Gaps = 0/26 (0%)
Strand=Plus/Plus
Query 1      CATGTTCAAAGATTAATCCAACAGGG 26
          ||||| |||||
Sbjct 106180 CATGTTTAAAGATTAATCCAACAGGG 106205
```

```

>ctg/p/1/000184/0
Length=1401273
Score = 44.1 bits (22), Expect = 0.001
Identities = 25/26 (96%), Gaps = 0/26 (0%)
Strand=Plus/Plus
Query 1          CATGTTCAAAGATTAATCCAACAGGG 26
                |||
Sbjct 501381     CATGTTCAAAGATTAATCCAACAGGG 501406

>ctg/p/1/000182/0
Length=2691948
Score = 44.1 bits (22), Expect = 0.001
Identities = 25/26 (96%), Gaps = 0/26 (0%)
Strand=Plus/Minus
Query 1          CATGTTCAAAGATTAATCCAACAGGG 26
                |||
Sbjct 122531     CATGTTCAAAGATTAATCCAACAGGG 122506

>ctg/p/1/000155/0
Length=4230312
Score = 44.1 bits (22), Expect = 0.001
Identities = 25/26 (96%), Gaps = 0/26 (0%)
Strand=Plus/Plus
Query 1          CATGTTCAAAGATTAATCCAACAGGG 26
                |||
Sbjct 1460714   CATGTTCAAAGATTAATCCAACAGGG 1460739

>ctg/p/1/004762/0
Length=65350
Score = 44.1 bits (22), Expect = 0.001
Identities = 25/26 (96%), Gaps = 0/26 (0%)
Strand=Plus/Plus
Query 1          CATGTTCAAAGATTAATCCAACAGGG 26
                |||
Sbjct 37088     CATGTTCAAAGATTAATCCAACAGGG 37113

>ctg/p/1/004391/0
Length=75958
Score = 44.1 bits (22), Expect = 0.001
Identities = 25/26 (96%), Gaps = 0/26 (0%)
Strand=Plus/Minus
Query 1          CATGTTCAAAGATTAATCCAACAGGG 26
                |||
Sbjct 19221     CATGTTCAAAGATTAATCCAACAGGG 19196

>ctg/p/1/003920/0
Length=94414
Score = 44.1 bits (22), Expect = 0.001
Identities = 25/26 (96%), Gaps = 0/26 (0%)
Strand=Plus/Minus
Query 1          CATGTTCAAAGATTAATCCAACAGGG 26
                |||
Sbjct 23552     CATGTTCAAAGATTAATCCAACAGGG 23527

>ctg/p/1/000023/0
Length=16067452
Score = 44.1 bits (22), Expect = 0.001
Identities = 25/26 (96%), Gaps = 0/26 (0%)
Strand=Plus/Minus
Query 1          CATGTTCAAAGATTAATCCAACAGGG 26
                |||
Sbjct 15518781  CATGTTCAAAGATTAATCCAACAGGG 15518756

```

```
>ctg/p/1/000020/0
Length=16569276
Score = 44.1 bits (22), Expect = 0.001
Identities = 25/26 (96%), Gaps = 0/26 (0%)
Strand=Plus/Plus
Query 1          CATGTTCAAAGATTAATCCAACAGGG 26
                |||||  |||||
Sbjct 13616027  CATGTTTAAAGATTAATCCAACAGGG 13616052
```

```
>ctg/p/1/000018/0
Length=16872726
Score = 44.1 bits (22), Expect = 0.001
Identities = 25/26 (96%), Gaps = 0/26 (0%)
Strand=Plus/Plus
Query 1          CATGTTCAAAGATTAATCCAACAGGG 26
                |||||  |||||
Sbjct 2431351   CATGTTTAAAGATTAATCCAACAGGG 2431376
```

```
>ctg/p/1/000044/0
Length=11815907
Score = 44.1 bits (22), Expect = 0.001
Identities = 25/26 (96%), Gaps = 0/26 (0%)
Strand=Plus/Plus
Query 1          CATGTTCAAAGATTAATCCAACAGGG 26
                |||||  |||||
Sbjct 1337526   CATGTTTAAAGATTAATCCAACAGGG 1337551
```

```
>ctg/p/1/000041/0
Length=12196511
Score = 44.1 bits (22), Expect = 0.001
Identities = 25/26 (96%), Gaps = 0/26 (0%)
Strand=Plus/Minus
Query 1          CATGTTCAAAGATTAATCCAACAGGG 26
                |||||  |||||
Sbjct 3036322   CATGTTTAAAGATTAATCCAACAGGG 3036297
```

```
>ctg/p/1/000064/0
Length=9759816
Score = 44.1 bits (22), Expect = 0.001
Identities = 25/26 (96%), Gaps = 0/26 (0%)
Strand=Plus/Plus
Query 1          CATGTTCAAAGATTAATCCAACAGGG 26
                |||||  |||||
Sbjct 8728548   CATGTTTAAAGATTAATCCAACAGGG 8728573
```

```
>ctg/p/1/000051/0
Length=10883686
Score = 44.1 bits (22), Expect = 0.001
Identities = 25/26 (96%), Gaps = 0/26 (0%)
Strand=Plus/Minus
Query 1          CATGTTCAAAGATTAATCCAACAGGG 26
                |||||  |||||
Sbjct 1470      CATGTTTAAAGATTAATCCAACAGGG 1445
```

```
>ctg/p/1/000071/0
Length=9192088
Score = 44.1 bits (22), Expect = 0.001
Identities = 25/26 (96%), Gaps = 0/26 (0%)
Strand=Plus/Minus
Query 1          CATGTTCAAAGATTAATCCAACAGGG 26
                |||||  |||||
Sbjct 7656027   CATGTTTAAAGATTAATCCAACAGGG 7656002
```

```
>ctg/p/1/000083/0
Length=8167830
Score = 44.1 bits (22), Expect = 0.001
Identities = 25/26 (96%), Gaps = 0/26 (0%)
Strand=Plus/Minus
Query 1          CATGTTCAAAGATTAATCCAACAGGG 26
                ||||| |
Sbjct 5958573    CATGTTTAAAGATTAATCCAACAGGG 5958548
```

```
>ctg/p/1/000120/0
Length=5777834
Score = 44.1 bits (22), Expect = 0.001
Identities = 25/26 (96%), Gaps = 0/26 (0%)
Strand=Plus/Plus
Query 1          CATGTTCAAAGATTAATCCAACAGGG 26
                ||||| |
Sbjct 502253     CATGTTTAAAGATTAATCCAACAGGG 502278
```

```
>ctg/p/1/000133/0
Length=5224621
Score = 44.1 bits (22), Expect = 0.001
Identities = 25/26 (96%), Gaps = 0/26 (0%)
Strand=Plus/Minus
Query 1          CATGTTCAAAGATTAATCCAACAGGG 26
                ||||| |
Sbjct 2116020    CATGTTTAAAGATTAATCCAACAGGG 2115995
```

```
Score = 36.2 bits (18), Expect = 0.30
Identities = 24/26 (92%), Gaps = 0/26 (0%)
Strand=Plus/Plus
Query 1          CATGTTCAAAGATTAATCCAACAGGG 26
                ||||| |
Sbjct 4972239    CATGTTTAAAGATTAATCCAATAGGG 4972264
```

```
>ctg/p/1/000011/0
Length=19930340
Score = 44.1 bits (22), Expect = 0.001
Identities = 25/26 (96%), Gaps = 0/26 (0%)
Strand=Plus/Minus
Query 1          CATGTTCAAAGATTAATCCAACAGGG 26
                ||||| |
Sbjct 3474675    CATGTTTAAAGATTAATCCAACAGGG 3474650
```

```
>ctg/p/1/000807/0
Length=707054
Score = 44.1 bits (22), Expect = 0.001
Identities = 25/26 (96%), Gaps = 0/26 (0%)
Strand=Plus/Minus
Query 1          CATGTTCAAAGATTAATCCAACAGGG 26
                ||||| |
Sbjct 26630      CATGTTTAAAGATTAATCCAACAGGG 26605
```

```
>ctg/p/1/000730/0
Length=719974
Score = 44.1 bits (22), Expect = 0.001
Identities = 25/26 (96%), Gaps = 0/26 (0%)
Strand=Plus/Plus
Query 1          CATGTTCAAAGATTAATCCAACAGGG 26
                ||||| |
Sbjct 387047     CATGTTTAAAGATTAATCCAACAGGG 387072
```

```

>ctg/p/1/001207/0
Length=199370
Score = 44.1 bits (22), Expect = 0.001
Identities = 25/26 (96%), Gaps = 0/26 (0%)
Strand=Plus/Plus
Query 1          CATGTTCAAAGATTAATCCAACAGGG 26
                ||||||| |||||||||||||||||||
Sbjct 140369     CATGTTTAAAGATTAATCCAACAGGG 140394

>ctg/p/1/001050/0
Length=539755
Score = 44.1 bits (22), Expect = 0.001
Identities = 25/26 (96%), Gaps = 0/26 (0%)
Strand=Plus/Plus
Query 1          CATGTTCAAAGATTAATCCAACAGGG 26
                ||||||| |||||||||||||||||||
Sbjct 255862     CATGTTTAAAGATTAATCCAACAGGG 255887

>ctg/p/1/000002/0
Length=35377810
Score = 44.1 bits (22), Expect = 0.001
Identities = 25/26 (96%), Gaps = 0/26 (0%)
Strand=Plus/Minus
Query 1          CATGTTCAAAGATTAATCCAACAGGG 26
                ||||||| |||||||||||||||||||
Sbjct 4908303    CATGTTTAAAGATTAATCCAACAGGG 4908278

>ctg/p/1/000001/0
Length=37491508
Score = 44.1 bits (22), Expect = 0.001
Identities = 25/26 (96%), Gaps = 0/26 (0%)
Strand=Plus/Minus
Query 1          CATGTTCAAAGATTAATCCAACAGGG 26
                ||||||| |||||||||||||||||||
Sbjct 1973189    CATGTTTAAAGATTAATCCAACAGGG 1973164

>ctg/p/c/006551/0
Length=19057
Score = 44.1 bits (22), Expect = 0.001
Identities = 25/26 (96%), Gaps = 0/26 (0%)
Strand=Plus/Plus
Query 1          CATGTTCAAAGATTAATCCAACAGGG 26
                ||||||| |||||||||||||||||||
Sbjct 13278      CATGTTTAAAGATTAATCCAACAGGG 13303

>ctg/p/1/000005/0
Length=26117305
Score = 44.1 bits (22), Expect = 0.001
Identities = 25/26 (96%), Gaps = 0/26 (0%)
Strand=Plus/Minus
Query 1          CATGTTCAAAGATTAATCCAACAGGG 26
                ||||||| |||||||||||||||||||
Sbjct 17659527   CATGTTTAAAGATTAATCCAACAGGG 17659502

Score = 44.1 bits (22), Expect = 0.001
Identities = 25/26 (96%), Gaps = 0/26 (0%)
Strand=Plus/Minus
Query 1          CATGTTCAAAGATTAATCCAACAGGG 26
                ||||||| |||||||||||||||||||
Sbjct 22383597   CATGTTTAAAGATTAATCCAACAGGG 22383572

```

```

>ctg/p/1/000004/0
Length=26849317
Score = 44.1 bits (22), Expect = 0.001
Identities = 25/26 (96%), Gaps = 0/26 (0%)
Strand=Plus/Minus
Query 1      CATGTTCAAAGATTAATCCAACAGGG  26
          ||||| |||||
Sbjct  824  CATGTTCAAAGATTAATCCAACAGGG  799

>ctg/p/1/000404/0
Length=1365740
Score = 44.1 bits (22), Expect = 0.001
Identities = 25/26 (96%), Gaps = 0/26 (0%)
Strand=Plus/Plus
Query 1      CATGTTCAAAGATTAATCCAACAGGG  26
          ||||| |||||
Sbjct  1161961 CATGTTCAAAGATTAATCCAACAGGG  1161986

>ctg/p/1/000391/0
Length=1085046
Score = 44.1 bits (22), Expect = 0.001
Identities = 25/26 (96%), Gaps = 0/26 (0%)
Strand=Plus/Plus
Query 1      CATGTTCAAAGATTAATCCAACAGGG  26
          ||||| |||||
Sbjct  666155  CATGTTCAAAGATTAATCCAACAGGG  666180

>ctg/p/1/000366/0
Length=1505255
Score = 44.1 bits (22), Expect = 0.001
Identities = 25/26 (96%), Gaps = 0/26 (0%)
Strand=Plus/Plus
Query 1      CATGTTCAAAGATTAATCCAACAGGG  26
          ||||| |||||
Sbjct  235855  CATGTTCAAAGATTAATCCAACAGGG  235880

>ctg/p/1/000363/0
Length=1511906
Score = 44.1 bits (22), Expect = 0.001
Identities = 25/26 (96%), Gaps = 0/26 (0%)
Strand=Plus/Minus
Query 1      CATGTTCAAAGATTAATCCAACAGGG  26
          ||||| |||||
Sbjct  1049604  CATGTTCAAAGATTAATCCAACAGGG  1049579

>ctg/p/1/000347/0
Length=1587001
Score = 44.1 bits (22), Expect = 0.001
Identities = 25/26 (96%), Gaps = 0/26 (0%)
Strand=Plus/Plus
Query 1      CATGTTCAAAGATTAATCCAACAGGG  26
          ||||| |||||
Sbjct  834128  CATGTTCAAAGATTAATCCAACAGGG  834153

>ctg/p/1/000329/0
Length=529183
Score = 44.1 bits (22), Expect = 0.001
Identities = 25/26 (96%), Gaps = 0/26 (0%)
Strand=Plus/Minus
Query 1      CATGTTCAAAGATTAATCCAACAGGG  26
          ||||| |||||
Sbjct  387733  CATGTTCAAAGATTAATCCAACAGGG  387708

```

Unmodified allele: Full-length guide match. "C" in the editing window is unmodified. The atypical T-to-C modification could be a potential sequencing error

```
>ctg/p/1/000584/0
Length=776203
Score = 44.1 bits (22), Expect = 0.001
Identities = 25/26 (96%), Gaps = 0/26 (0%)
Strand=Plus/Minus
Query 1      CATGTTCAAAGATTAATCCAACAGGG 26
          ||||| |||||
Sbjct 558936 CATGTTCAAAGATTAATCCAACAGGG 558911
```

```
>ctg/p/1/000532/0
Length=1043252
Score = 44.1 bits (22), Expect = 0.001
Identities = 25/26 (96%), Gaps = 0/26 (0%)
Strand=Plus/Plus
Query 1      CATGTTCAAAGATTAATCCAACAGGG 26
          ||||| |||||
Sbjct 699998 CATGTTCAAAGATTAATCCAACAGGG 700023
```

```
>ctg/p/1/000019/0
Length=16594298
Score = 40.1 bits (20), Expect = 0.019
Identities = 23/24 (96%), Gaps = 0/24 (0%)
Strand=Plus/Plus
Query 3      TGTTCAAAGATTAATCCAACAGGG 26
          |||| |||||
Sbjct 8997607 TGTTCAAAGATTAATCCAACAGGG 8997630
```

```
>ctg/p/1/000006/0
Length=24590259
Score = 40.1 bits (20), Expect = 0.019
Identities = 20/20 (100%), Gaps = 0/20 (0%)
Strand=Plus/Plus
Query 1      CATGTTCAAAGATTAATCCA 20
          |||||
Sbjct 879191 CATGTTCAAAGATTAATCCA 879210
```

Other potential off-target: No PAM-motif. No modification.

```
>ctg/p/1/000077/0
Length=8648054
Score = 36.2 bits (18), Expect = 0.30
Identities = 24/26 (92%), Gaps = 0/26 (0%)
Strand=Plus/Plus
Query 1      CATGTTCAAAGATTAATCCAACAGGG 26
          ||||| |||
Sbjct 6435571 CATGTTCAAAGATTAATCCAACAGGG 6435596
```

```
>ctg/p/1/000042/0
Length=12060338
Score = 34.2 bits (17), Expect = 1.2
Identities = 17/17 (100%), Gaps = 0/17 (0%)
Strand=Plus/Minus
Query 6      TCAAAGATTAATCCAAC 22
          |||||
Sbjct 10989117 TCAAAGATTAATCCAAC 10989101
```

Other potential off-targets: No full-length guide match. No modification.

```
>ctg/p/1/000065/0
Length=9713824
Score = 34.2 bits (17), Expect = 1.2
Identities = 17/17 (100%), Gaps = 0/17 (0%)
Strand=Plus/Plus
Query 8      AAAGATTAATCCAACAG 24
          |||||
Sbjct 6179604 AAAGATTAATCCAACAG 6179620
```

```
>ctg/p/1/000283/0
Length=2069269
Score = 32.2 bits (16), Expect = 4.7
Identities = 16/16 (100%), Gaps = 0/16 (0%)
Strand=Plus/Minus
Query 6      TCAAAGATTAATCCA 21
            |||
Sbjct 433581 TCAAAGATTAATCCA 433566
```

```
>ctg/p/1/000229/0
Length=2491534
Score = 32.2 bits (16), Expect = 4.7
Identities = 19/20 (95%), Gaps = 0/20 (0%)
Strand=Plus/Plus
Query 1      CATGTTCAAAGATTAATCCA 20
            |||
Sbjct 2165739 CATGTTCAAAGATTATCCA 2165758
```

No PAM motif. No C-to-T conversion in the window. The A-to-T variation is likely a SNP

```
>ctg/p/1/000157/0
Length=4177983
Score = 32.2 bits (16), Expect = 4.7
Identities = 16/16 (100%), Gaps = 0/16 (0%)
Strand=Plus/Minus
Query 1      CATGTTCAAAGATTAA 16
            |||
Sbjct 2614161 CATGTTCAAAGATTAA 2614146
```

```
>ctg/p/1/000022/0
Length=16386320
Score = 32.2 bits (16), Expect = 4.7
Identities = 16/16 (100%), Gaps = 0/16 (0%)
Strand=Plus/Plus
Query 6      TCAAAGATTAATCCA 21
            |||
Sbjct 14219288 TCAAAGATTAATCCA 14219303
```

```
>ctg/p/1/000035/0
Length=13100527
Score = 32.2 bits (16), Expect = 4.7
Identities = 16/16 (100%), Gaps = 0/16 (0%)
Strand=Plus/Minus
Query 1      CATGTTCAAAGATTAA 16
            |||
Sbjct 5939357 CATGTTCAAAGATTAA 5939342
```

Other potential off-targets: No full-length guide match. No modification.

```
>ctg/p/1/000034/0
Length=13195684
Score = 32.2 bits (16), Expect = 4.7
Identities = 16/16 (100%), Gaps = 0/16 (0%)
Strand=Plus/Plus
Query 2      ATGTTCAAAGATTAAT 17
            |||
Sbjct 1091512 ATGTTCAAAGATTAAT 1091527
```

```
>ctg/p/1/000031/0
Length=13501503
Score = 32.2 bits (16), Expect = 4.7
Identities = 16/16 (100%), Gaps = 0/16 (0%)
Strand=Plus/Minus
Query 2      ATGTTCAAAGATTAAT 17
            |||
Sbjct 13401945 ATGTTCAAAGATTAAT 13401930
```

```
>ctg/p/1/000030/0
Length=13865225
Score = 32.2 bits (16), Expect = 4.7
Identities = 16/16 (100%), Gaps = 0/16 (0%)
Strand=Plus/Minus
Query 3      TGTTCAAAGATTAATC 18
            |||
Sbjct 13527081 TGTTCAAAGATTAATC 13527066
```

```
>ctg/p/1/000029/0
Length=14498594
Score = 32.2 bits (16), Expect = 4.7
Identities = 16/16 (100%), Gaps = 0/16 (0%)
Strand=Plus/Minus
Query 1      CATGTTCAAAGATTAA 16
            |||
Sbjct 2520849  CATGTTCAAAGATTAA 2520834
```

```
>ctg/p/1/000048/0
Length=11255473
Score = 32.2 bits (16), Expect = 4.7
Identities = 16/16 (100%), Gaps = 0/16 (0%)
Strand=Plus/Plus
Query 2      ATGTTCAAAGATTAAT 17
            |||
Sbjct 2421392  ATGTTCAAAGATTAAT 2421407
```

```
>ctg/p/1/000045/0
Length=11433674
Score = 32.2 bits (16), Expect = 4.7
Identities = 16/16 (100%), Gaps = 0/16 (0%)
Strand=Plus/Minus
Query 5      TTCAAAGATTAATCCA 20
            |||
Sbjct 6274869  TTCAAAGATTAATCCA 6274854
```

```
>ctg/p/1/000061/0
Length=9943486
Score = 32.2 bits (16), Expect = 4.7
Identities = 16/16 (100%), Gaps = 0/16 (0%)
Strand=Plus/Plus
Query 2      ATGTTCAAAGATTAAT 17
            |||
Sbjct 90264    ATGTTCAAAGATTAAT 90279
```

```
>ctg/p/1/000078/0
Length=8605118
Score = 32.2 bits (16), Expect = 4.7
Identities = 16/16 (100%), Gaps = 0/16 (0%)
Strand=Plus/Minus
Query 2      ATGTTCAAAGATTAAT 17
            |||
Sbjct 3792361  ATGTTCAAAGATTAAT 3792346
```

```
>ctg/p/1/000076/0
Length=8651189
Score = 32.2 bits (16), Expect = 4.7
Identities = 16/16 (100%), Gaps = 0/16 (0%)
Strand=Plus/Minus
Query 1      CATGTTCAAAGATTAA 16
            |||
Sbjct 910171   CATGTTCAAAGATTAA 910156
```

Other potential off-targets: No full-length guide match. No modification.

```
>ctg/p/1/000070/0
Length=9202715
Score = 32.2 bits (16), Expect = 4.7
Identities = 16/16 (100%), Gaps = 0/16 (0%)
Strand=Plus/Minus
Query 2      ATGTTCAAAGATTAAT 17
            |||
Sbjct 7888261 ATGTTCAAAGATTAAT 7888246
```

```
>ctg/p/1/000110/0
Length=5881360
Score = 32.2 bits (16), Expect = 4.7
Identities = 16/16 (100%), Gaps = 0/16 (0%)
Strand=Plus/Plus
Query 1      CATGTTCAAAGATTAA 16
            |||
Sbjct 2066902 CATGTTCAAAGATTAA 2066917
```

```
>ctg/p/1/000142/0
Length=4923165
Score = 32.2 bits (16), Expect = 4.7
Identities = 16/16 (100%), Gaps = 0/16 (0%)
Strand=Plus/Minus
Query 6      TCAAAGATTAATCCAA 21
            |||
Sbjct 2834137 TCAAAGATTAATCCAA 2834122
```

```
>ctg/p/1/000132/0
Length=5238981
Score = 32.2 bits (16), Expect = 4.7
Identities = 16/16 (100%), Gaps = 0/16 (0%)
Strand=Plus/Minus
Query 6      TCAAAGATTAATCCAA 21
            |||
Sbjct 3462179 TCAAAGATTAATCCAA 3462164
```

```
>ctg/p/1/000015/0
Length=18788804
Score = 32.2 bits (16), Expect = 4.7
Identities = 16/16 (100%), Gaps = 0/16 (0%)
Strand=Plus/Minus
Query 2      ATGTTCAAAGATTAAT 17
            |||
Sbjct 4715006 ATGTTCAAAGATTAAT 4714991
```

```
>ctg/p/1/000813/0
Length=700004
Score = 32.2 bits (16), Expect = 4.7
Identities = 16/16 (100%), Gaps = 0/16 (0%)
Strand=Plus/Plus
Query 8      AAAGATTAATCCAACA 23
            |||
Sbjct 448872  AAAGATTAATCCAACA 448887
```

```
>ctg/p/1/000790/0
Length=724722
Score = 32.2 bits (16), Expect = 4.7
Identities = 16/16 (100%), Gaps = 0/16 (0%)
Strand=Plus/Plus
Query 1      CATGTTCAAAGATTAA 16
            |||
Sbjct 291390  CATGTTCAAAGATTAA 291405
```

Other potential off-targets: No full-length guide match. No modification.

```
>ctg/p/1/000848/0
Length=295309
Score = 32.2 bits (16), Expect = 4.7
Identities = 16/16 (100%), Gaps = 0/16 (0%)
Strand=Plus/Plus
Query 2      ATGTTCAAAGATTAAT 17
            |||
Sbjct 212421 ATGTTCAAAGATTAAT 212436
```

```
>ctg/p/1/001105/0
Length=507962
Score = 32.2 bits (16), Expect = 4.7
Identities = 16/16 (100%), Gaps = 0/16 (0%)
Strand=Plus/Minus
Query 1      CATGTTCAAAGATTAA 16
            |||
Sbjct 7763   CATGTTCAAAGATTAA 7748
```

```
>ctg/p/1/000309/0
Length=1824814
Score = 32.2 bits (16), Expect = 4.7
Identities = 16/16 (100%), Gaps = 0/16 (0%)
Strand=Plus/Minus
Query 7      CAAAGATTAATCCAAC 22
            |||
Sbjct 1398515 CAAAGATTAATCCAAC 1398500
```

Other potential off-targets: No full-length guide match. No modification.

## Supplementary data #2

### Pathology report

| Specimen identification                                                                                                        |
|--------------------------------------------------------------------------------------------------------------------------------|
| Specimen name: Wild type and genetically modified XENOpig livers                                                               |
| Specimen IDs: 007, 009 and 010 (Wild type pigs perfused with human blood);<br>005 and 008 (XENOpigs perfused with human blood) |
| Case number: Pathology report                                                                                                  |

**SPECIMEN LABEL(s):** *Ex vivo* perfused liver

**PATIENT HISTORY:** All pigs were physiologically healthy at the time of euthanasia and liver perfusion.

**DIAGNOSIS:** As seen below, the wild type pigs perfused with human blood exhibited signs of rejection evident by congestion at 6 hrs post-perfusion. The congestion was marked by 14 hr timepoint, and the sporadic congestion became patchy leading to necrosis of the liver samples. By 36 hrs, the congestion and liver necrosis was marked. The lesions in Animals # 007, 009 and 010 were more severe, acute, and exhibited necrotizing features with vascular thromboses, and severe sub-massive to massive necrosis in all liver specimens. Conversely, Animals 005 and 008 displayed multifocal areas of survival, albeit existence of degenerate hepatocytes, which actively produced significant amount of bile.

Overall, the microscopic lesions observed in Animals# 007, 009 and 010 and Animal 005 and 008 were distinguishable. Histological parameters were markedly better at 24 hrs when compared to the wild type pigs, with the first signs of congestion appearing at 36 hrs and marked patchy congestion/ necrosis evident at 48 hrs of age.

**Animals 007, 009 and 010**

1hr 14m post-surgery (Day 1)

No significant lesion was found.

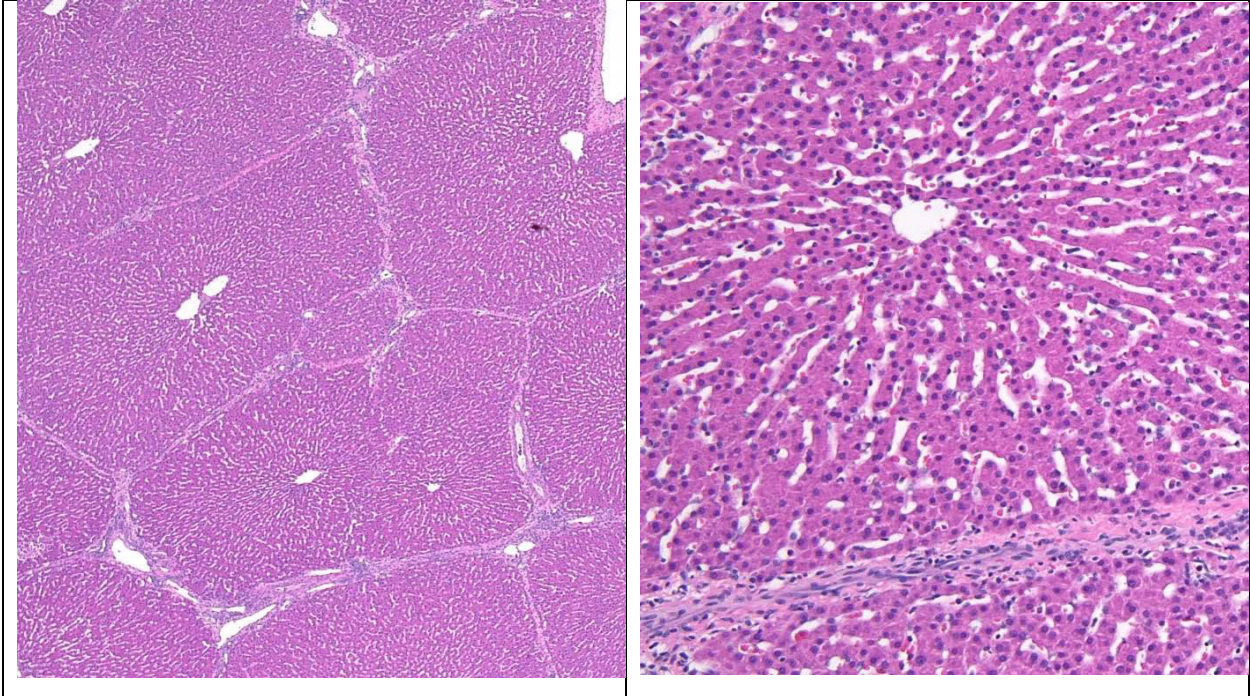

5hr 51m post-surgery (Day 1)

There were multifocal lobular congestion, hepatocellular vacuolar degeneration, and mild coagulative/ischemic necrosis. Several blood vessels (mostly veins) were thrombosed. Few neutrophils and lymphocytes were scattered in the portal and periportal areas. This was the earliest time point showing the pathologic changes associated with xenotransplantation in this animal.

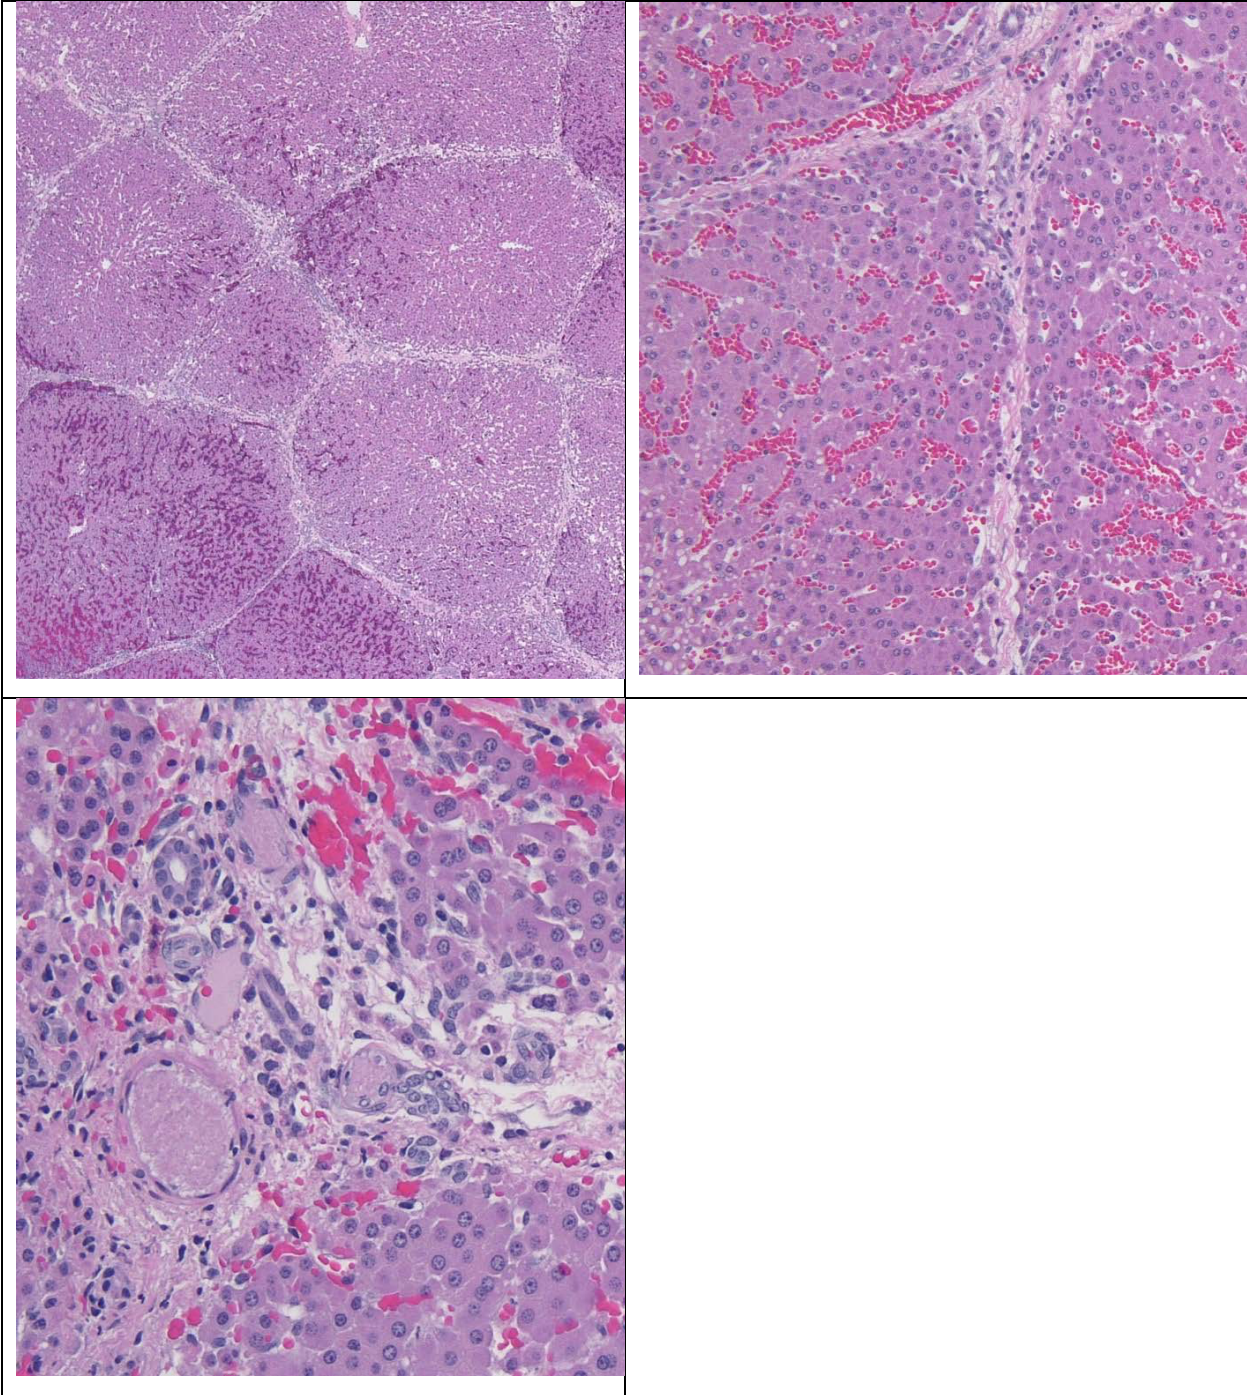

6hr 5m post-surgery (Day 2)

There was diffuse severe submassive hepatocellular coagulative/ischemic necrosis and loss. The hepatic cords were dissociated. Many blood vessels were thrombosed, and the endothelial cells were plump.

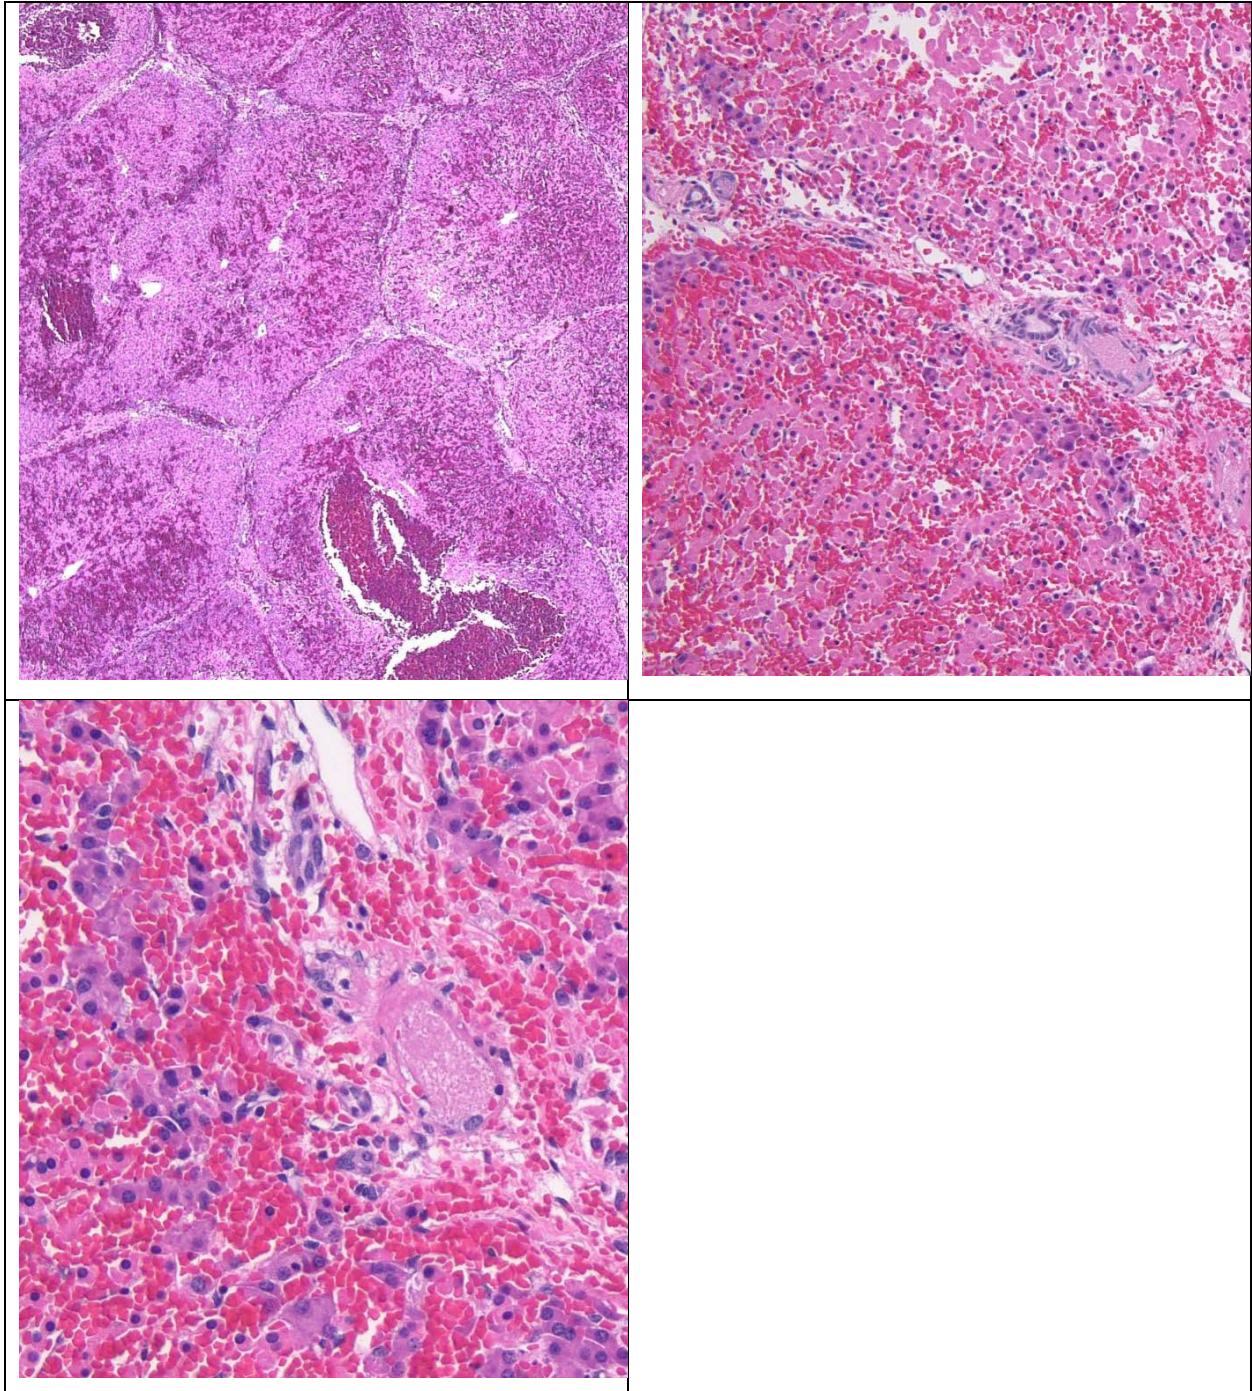

42hr 20m post-surgery (Day 3)

There was diffuse severe sub-massive to massive hepatocellular coagulative/ischemic necrosis and loss. Due to the hepatocellular loss, the hepatic lobules were smaller than normal. The portal areas and lobular septa were expanded with hemorrhage, edema, and inflammation. The blood vessels were thrombosed. The inflammatory cells were neutrophils and lymphocytes.

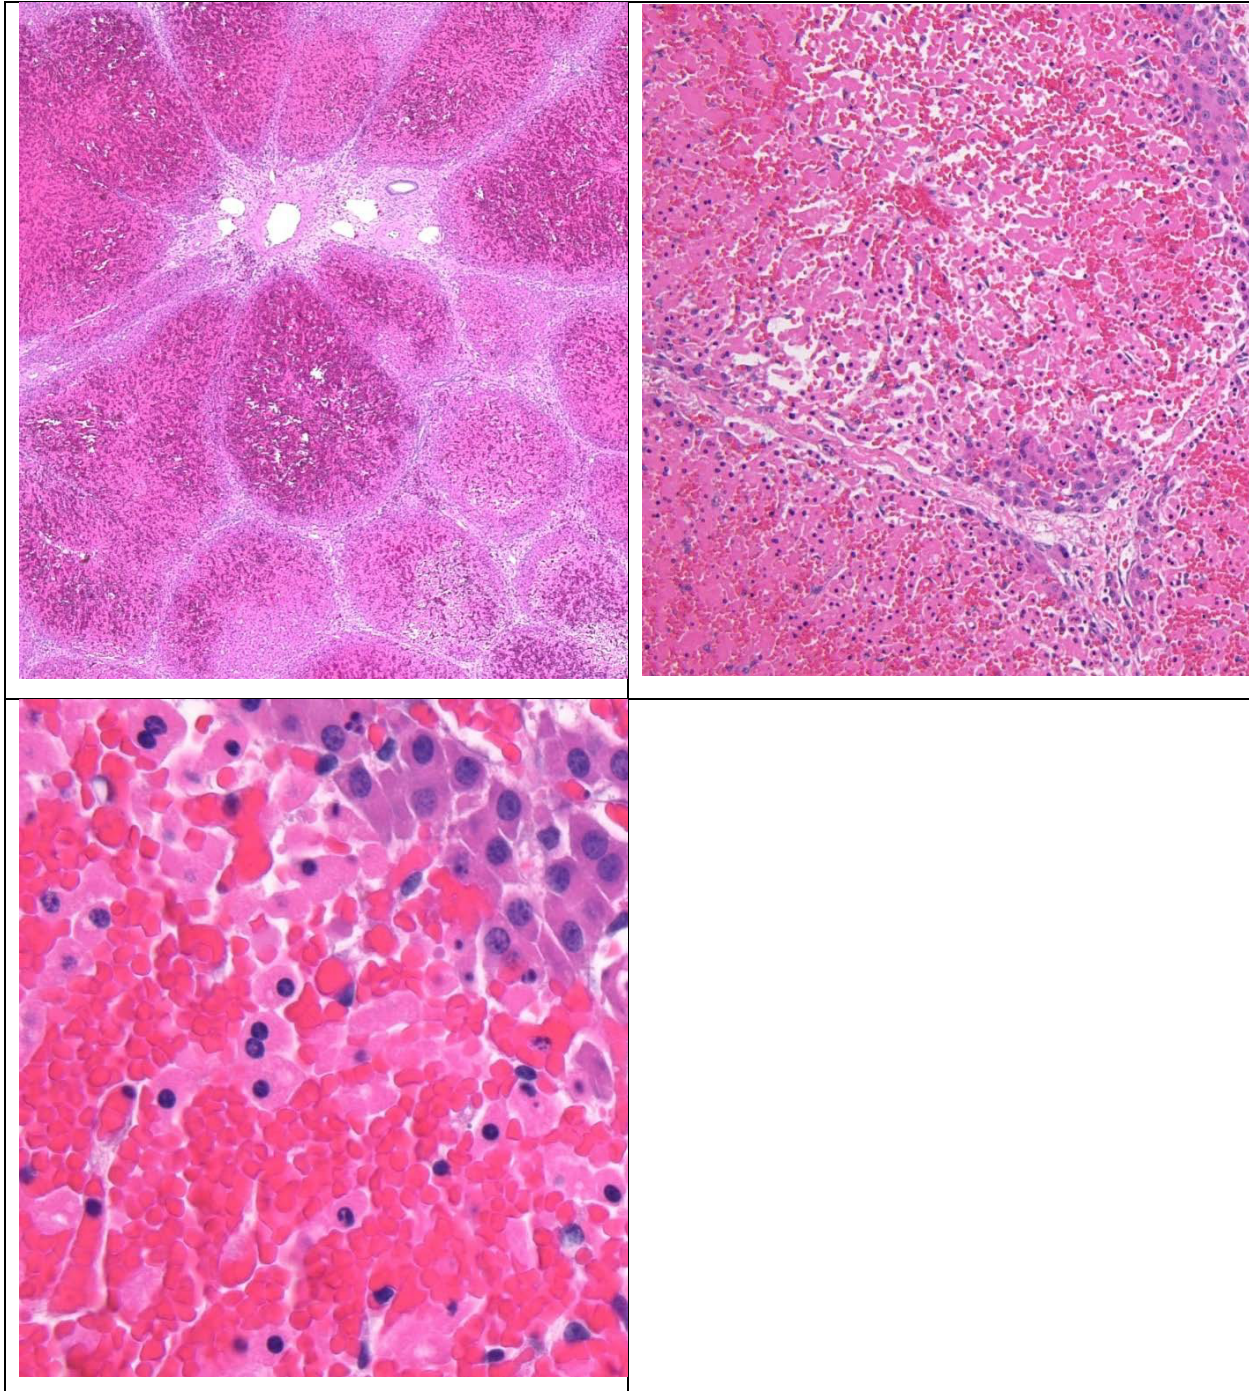

**Animals 005 and 008**

2hr 58m post-surgery (Day 1)

No significant microscopic lesion was noted.

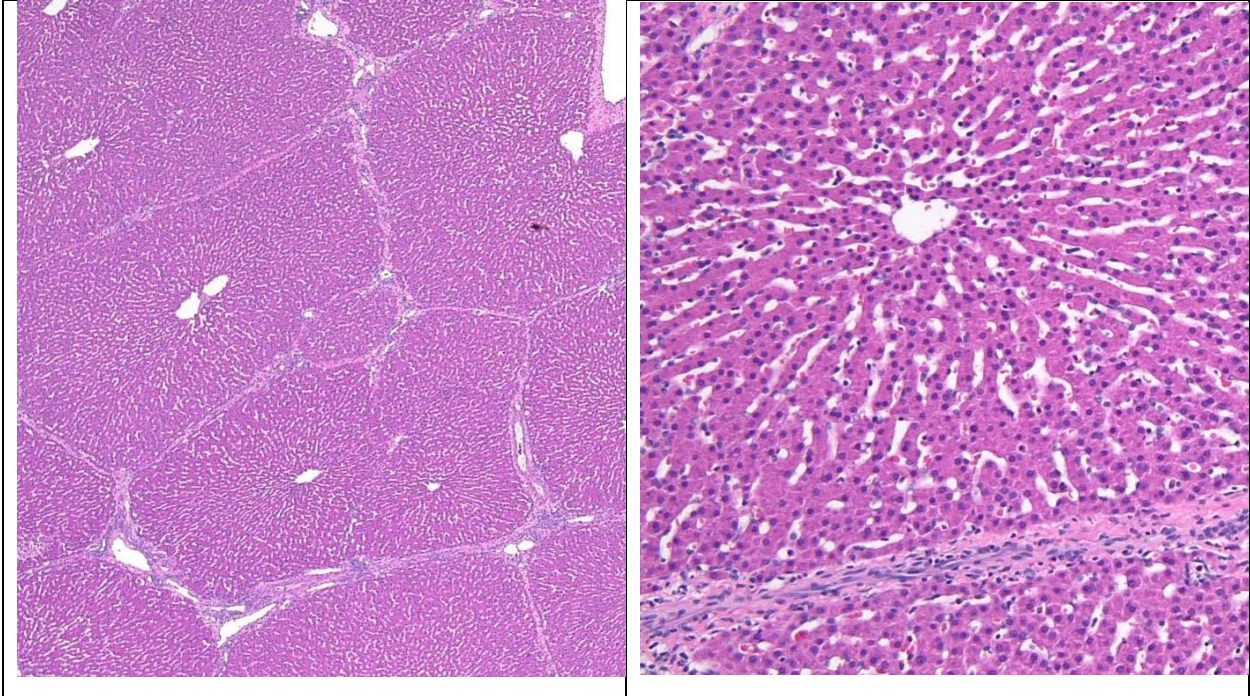

5hr 36m post-surgery (Day 1)

There was multifocal mild centrilobular hepatocellular vacuolar degeneration and multifocal random mild hepatocellular degeneration and coagulative necrosis. Several blood vessels were thrombosed. A few inflammatory cells including neutrophils and lymphocytes infiltrate the portal areas. This was the earliest time point showing microscopic lesions.

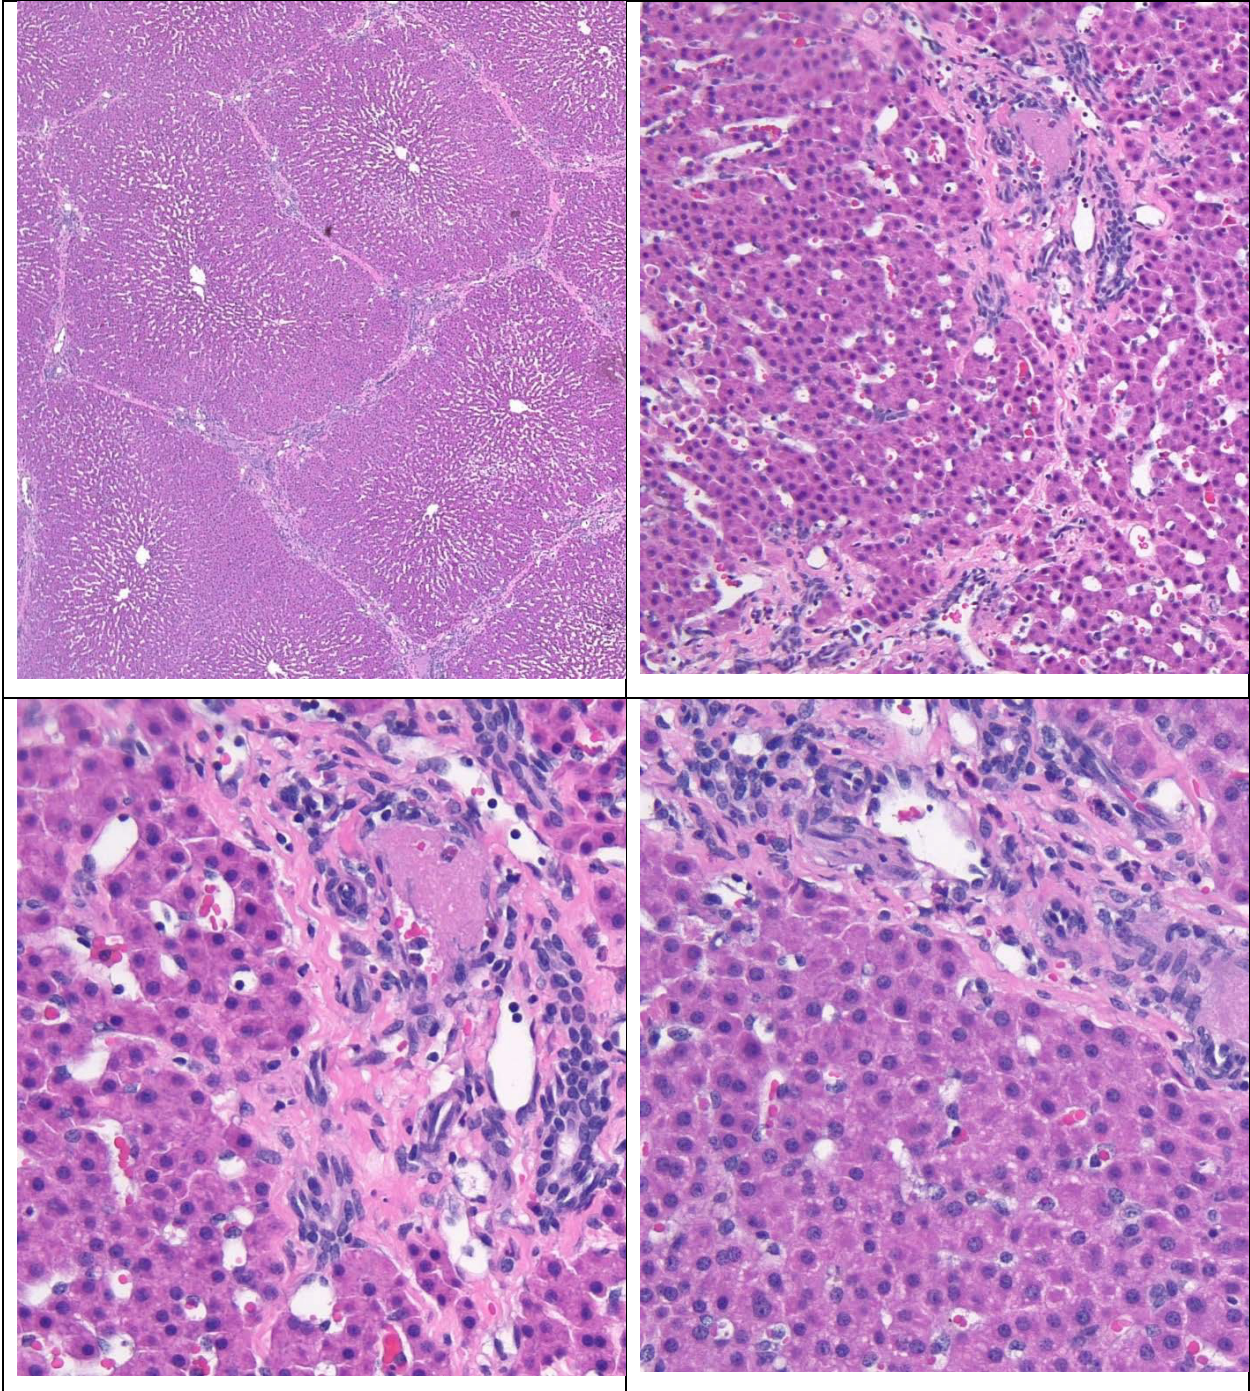

14hr 06m post-surgery (Day 2)

There was mild multifocal centrilobular to midzonal hepatocellular coagulative/ischemic necrosis with hemorrhage. The blood vessels, often veins, were commonly thrombosed with plump endothelial cells. The portal areas had multifocal mild inflammation with neutrophils, eosinophils, and lymphocytes.

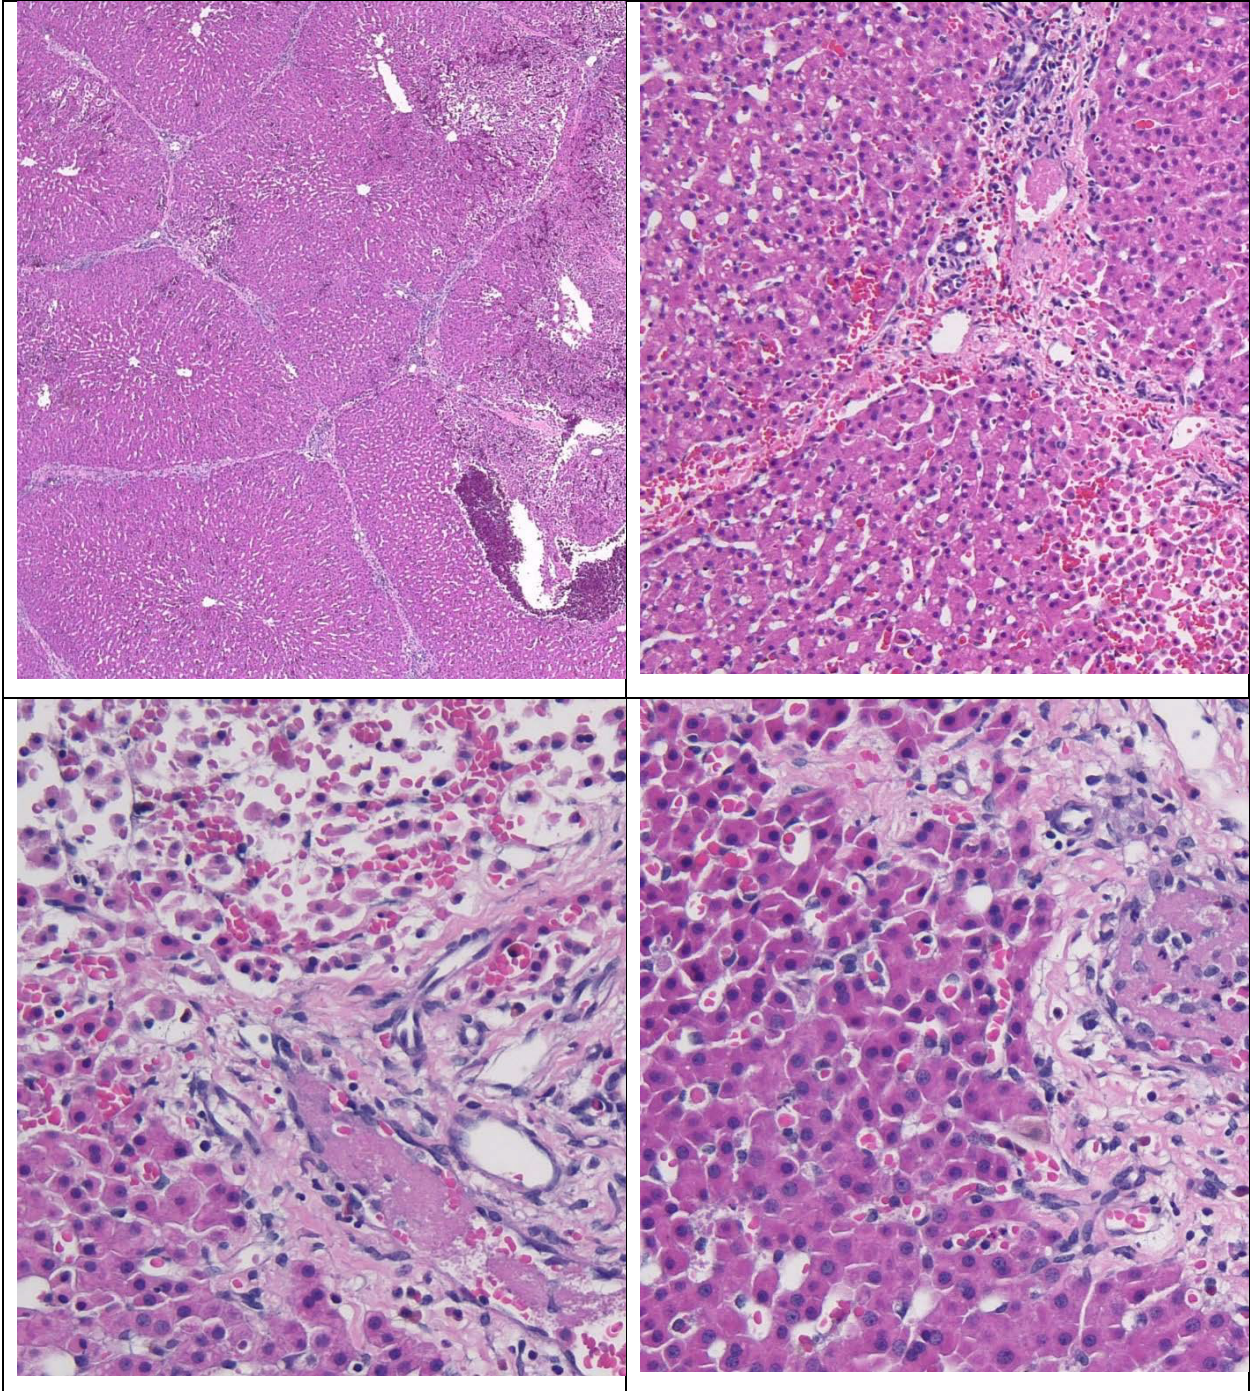

46hr 51m post-surgery (Day 3)

There was multifocal mild to moderate centrilobular to midzonal hepatocellular coagulative/ischemic necrosis with hemorrhage. The blood vessels were commonly thrombosed. In the pictures of the lower row, the hepatocytes were either necrotic with pyknosis or degenerate with cytoplasmic vacuoles and yellow brown pigment granules (bile). The bile canaliculi were prominent with bile plugging.

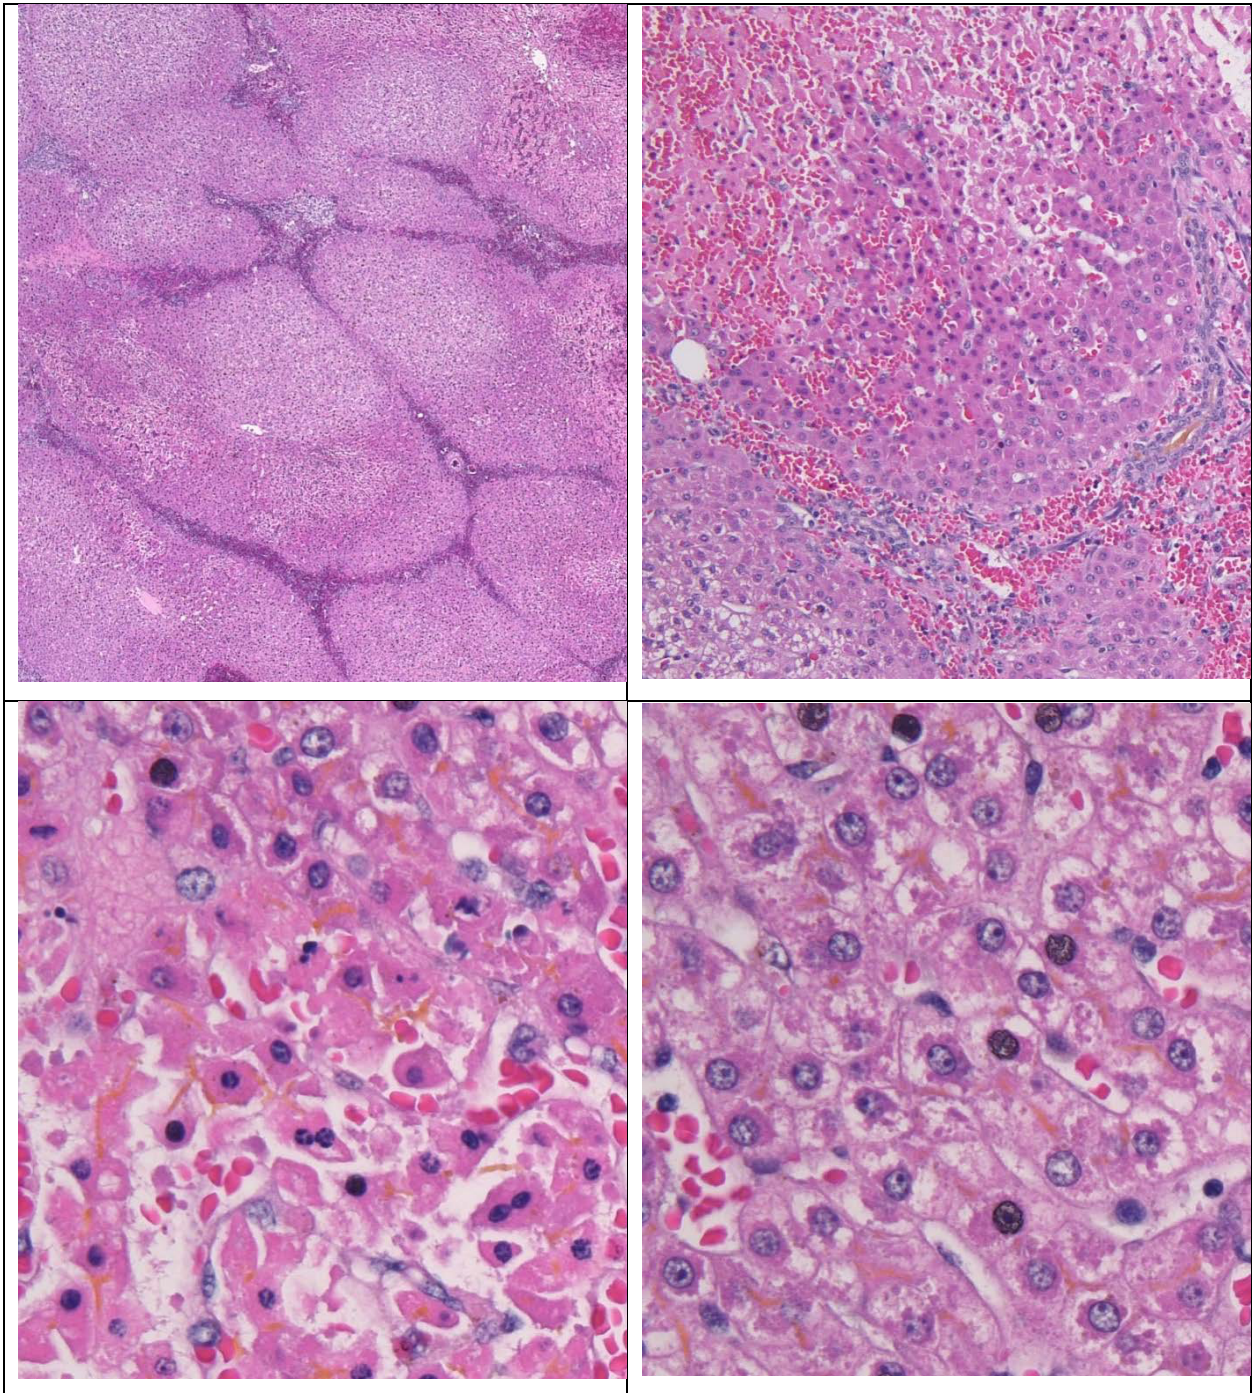

**Specimen ID: Wild type pig livers (007, 009 and 010 perfused with human blood)**

|                |                                                                                                                   |
|----------------|-------------------------------------------------------------------------------------------------------------------|
| 007 3/25 16:05 | Minimal sinusoidal dilatation                                                                                     |
| 007 3/25 16:45 | Minimal sinusoidal dilatation and congestion                                                                      |
| 007 3/25 17:19 | Minimal sinusoidal dilatation and congestion                                                                      |
| 007 3/25 21:56 | Focal zone 3 congestion and hepatocyte drop out/ necrosis<br>Minimal sinusoidal dilatation/ congestion            |
| 007 3/26 6:05  | Zone 3 congestion/ hemorrhage and hepatocyte dropout/ necrosis                                                    |
| 007 3/26 16:46 | zone 3 congestion/ hemorrhage and hepatocyte dropout/ necrosis                                                    |
| 007 3/27 8:25  | Zone 3 congestion/ hemorrhage and hepatocyte dropout/ necrosis to areas of Near total hemorrhagic necrosis        |
| 007 3/27 8:55  | Patchy zone 3 congestion/ hemorrhage and hepatocyte dropout/ necrosis to areas of Near total hemorrhagic necrosis |

| Slide label     | Histology findings                                                                                                                                         |
|-----------------|------------------------------------------------------------------------------------------------------------------------------------------------------------|
| 009 05/13 17:18 | Minimal sinusoidal dilatation                                                                                                                              |
| 009 05/13 18:33 | Minimal sinusoidal dilatation and congestion                                                                                                               |
| 009 05/13 20:25 | Minimal sinusoidal dilatation and congestion                                                                                                               |
| 009 05/13 23:59 | Focal zone 3 congestion and hepatocyte drop out/ necrosis<br>Minimal sinusoidal dilatation/ congestion                                                     |
| 009 05/14 06:30 | Patchy zone 3 congestion/ hemorrhage and hepatocyte dropout/ necrosis                                                                                      |
| 009 05/14 17:17 | Patchy zone 3 congestion/ hemorrhage and hepatocyte dropout/ necrosis to areas of Near total hemorrhagic necrosis<br>C4d -negative on representative block |

|                 |                                                                                                                      |
|-----------------|----------------------------------------------------------------------------------------------------------------------|
| 009 05/15 17:25 | Patchy zone 3 congestion/ hemorrhage and hepatocyte dropout/ necrosis to areas of<br>Near total hemorrhagic necrosis |
|-----------------|----------------------------------------------------------------------------------------------------------------------|

| Slide label     | Histology findings                                                                                                                             |
|-----------------|------------------------------------------------------------------------------------------------------------------------------------------------|
| 010 05/20 17:25 | Minimal sinusoidal dilatation                                                                                                                  |
| 010 05/20 17:57 | Minimal sinusoidal dilatation and congestion                                                                                                   |
| 010 05/20 19:13 | Minimal sinusoidal dilatation and congestion                                                                                                   |
| 010 05/20 21:10 | Focal zone 3 congestion and hepatocyte dropout/ necrosis<br><br>Minimal sinusoidal dilatation/ congestion                                      |
| 010 05/21 17:45 | Patchy zone 3 congestion/ hemorrhage and hepatocyte dropout/<br>necrosis/microthrombosis/ karyorhexis                                          |
| 010 05/21 22:35 | Patchy zone 3 congestion/ hemorrhage and hepatocyte dropout/ necrosis to areas of<br>Near total hemorrhagic necrosis/major thrombotic plaques  |
| 010 05/21 23:58 | Patchy zone 3 congestion/ hemorrhage and hepatocyte dropout/ major thrombotic<br>plaques/ necrosis to areas of Near total hemorrhagic necrosis |

**Specimen ID: XenoPig liver (005 perfused with human blood)**

|                |                                                                                                                                                                                                                                         |
|----------------|-----------------------------------------------------------------------------------------------------------------------------------------------------------------------------------------------------------------------------------------|
| 005 2/26 17:00 | Minimal sinusoidal dilatation                                                                                                                                                                                                           |
| 005 2/26 18:10 | Minimal sinusoidal dilatation                                                                                                                                                                                                           |
| 005 2/27 7:15  | Sporadic patchy congestion                                                                                                                                                                                                              |
| 005 2/28 9:10  | Patchy zone 3 congestion/ hemorrhage and hepatocyte dropout/ necrosis to Near total hemorrhagic necrosis (Marked zone 3 congestion and almost complete liver cell dropout)<br><br>Some ductular cholestasis<br><br>Few veins with clots |

**Specimen ID: XenoPig liver (008 perfused with human blood)**

|               |                                                                       |
|---------------|-----------------------------------------------------------------------|
| 008 4/1 16:24 | Minimal sinusoidal dilatation                                         |
| 008 4/1 17:12 | Minimal sinusoidal dilatation                                         |
| 008 4/1 18:12 | Minimal sinusoidal dilatation                                         |
| 008 4/1 19:22 | Minimal sinusoidal dilatation                                         |
| 008 4/1 22:00 | Minimal sinusoidal dilatation                                         |
| 008 4/2 6:30  | Minimal sinusoidal dilatation                                         |
| 008 4/2 17:20 | Sporadic patchy congestion                                            |
| 008 4/3 15:15 | Sporadic patchy congestion                                            |
| 008 4/3 16:09 | Patchy zone 3 congestion                                              |
| 008 4/3 16:13 | Patchy zone 3 congestion/ hemorrhage and hepatocyte dropout/ necrosis |

**Supplementary Table S1: Single Guide (sg) RNA used in the manuscript**

| sgRNA    | Sequence + PAM          |
|----------|-------------------------|
| PERV     | GTTCAAAGATTAATCCAACAGGG |
| GGTA1    | CTTCCAAAACAACTTTGGGGTGG |
| B4GalNT2 | AGTGCCAATGTGACGCCTTCGGG |
| CMAH     | CACCATCCTCGCGCAAAAGCAGG |
| GHR      | AGAGTCCAGTTGAGGCCAATGGG |

**Supplementary Table S2: Primers used in the study**

| Primer Name | Sequence               | Size   |
|-------------|------------------------|--------|
| PERV_F      | GCCAGTGCTACACCAGTATCAG | 176 bp |
| PERV_R      | ACTGGTCGATAATCATTGGTCC |        |
| GGTA1_F     | AGATCAAGTCCGAGAAGAGGTG | 286 bp |
| GGTA1_R     | ATGGCTGCGTGGTAATAAAAAT |        |
| B4GALNT2_F  | TTATTTTAGGCTGTTCCCGAAA | 159 bp |
| B4GALNT2_R  | CATCTGCAATACCTCCTCTGAA |        |
| CMAH_F      | ATCACGTACCTTACTCACGCCT | 200 bp |
| CMAH_R      | CTTCCTTACCTCAGGTGGTCTG |        |
| GHR_F       | ATTCCATTAATACCAAGCGGTG | 174 bp |
| GHR_R       | ATCCCTTCTGAACATCTGCATT |        |

**Supplementary Table S3: Reference Target amplicon sequence of target genes**

| Target Gene (size)      | Amplicon sequence for NGS                                                                                                                                                                                                                                                                           |
|-------------------------|-----------------------------------------------------------------------------------------------------------------------------------------------------------------------------------------------------------------------------------------------------------------------------------------------------|
| <b>PERV (176bp)</b>     | gccagtgctacaccagtatcagtcagacagtagcccttgatgtagagaggctcgagaaggaatttggccgcatgttcaaagattaatccaacagggcatccttagc<br>tcctgtccaatccccttggataactcccctgctaccgggttaggaagcctgggaccaatgattatcgaccagt                                                                                                             |
| <b>GGTA1 (286bp)</b>    | agatcaagtcgagaagaggtggcaagacatcagcatgatgcatgaagaccatcggggagcacatcctggcccacatccagcacgaggtggacttcctcttc<br>tgcattggacgtggatcaggtcttccaaaaaacactttgggggtggagaccctggccagtcggtggctcagctacaggcctggtgtacaaggcacatcctgacga<br>gttcacctacgagagggcgaaggagtcgcgagcctacattccgtttggccaggggatttttattaccacgcagccat |
| <b>B4GALNT2 (159bp)</b> | ttatTTtaggctgttcccgaiaaacagtgccaatgtgacgccttcgggcatcaggaaagctataaacttggaggatgcctacgaccccgctgacctcccgcag<br>tgaaectgaggagacaggetgagctcgaacactttcagaggaggtattgcagatg                                                                                                                                  |
| <b>CMAH (200bp)</b>     | atcacgtaccttactcagcctgcatggacctcaagctgggagacaagaggatggtggtcagatccttggtaactcggctcctgcttttgcgagagatggtggt<br>actacacgagcctccatctgatggctggagaggtgagccgcgcagatttaatttacatcagtcacatgcaactcagaccactgaggttaaggaag                                                                                          |
| <b>GHR (174bp)</b>      | attccattaataccaagcgggtgtctatgtgctgattctctgttgaatccacagtgcaaccggatccaaccattggcctcaactggactctactgaatatcag<br>ttaacaggagattcatgcagatataccaagtgagatgggaaccacctccaatgcagatgttcagaagggat                                                                                                                  |

**Supplementary Table S4.** Antibodies and lectins used in the study for immunohistochemistry

| Applications                     | Gene     | Antibody name                                                                                      | Source             | Catalog #   | Conjugate | Host/Isotype | Dilution                           |
|----------------------------------|----------|----------------------------------------------------------------------------------------------------|--------------------|-------------|-----------|--------------|------------------------------------|
| ICC                              | GGTA1    | Primary: $\alpha$ -Gal Epitope (Gal $\alpha$ 1-3Gal $\beta$ 1-4GlcNAc-R) monoclonal antibody (M86) | Enzo Life Sciences | ALX-801-090 |           | Mouse        | 1 in 100                           |
|                                  |          | $\alpha$ -Gal Epitope (Gal $\alpha$ 1-3Gal $\beta$ 1-4GlcNAc-R) monoclonal antibody (M86)          |                    |             |           |              |                                    |
|                                  |          | Secondary: Goat Anti Mouse Cy5 647                                                                 | Thermo Fisher      | A28181      |           | Goat         | 1 in 500                           |
| DBA lectin fluorescence staining | B4GALNT2 | Dolichos Biflorus (Horse Gram) Agglutinin (DBA), fluorescein (FITC)                                | Thermo Fisher      | L32474      | FITC      |              | 1:200 (10 $\mu$ g/mL);<br>1 in 250 |
| ICC                              | CMAH     | Primary: Purified anti-Neu5Gc Antibody                                                             | Biolegend          | 146903      |           | Chicken      | 1 in 500                           |
|                                  |          | Secondary: Goat Anti chicken Cy5 647                                                               | Thermo Fisher      | A28181      |           | Goat         |                                    |
